# Supplementary material for: [2 + 1 + 1] Assembly of spiro β-lactams by Rh(ii)-catalyzed reaction of diazocarbonyl compounds with azirines/isoxazoles
Source: Royal Society of Chemistry journal article supplement (doi:10.1039/c9ob01301f), 2019-01-01
Supplement: c9ob01301f1.pdf [file c9ob01301f1.pdf]

## *Supplementary information*

### **[2+1+1] Assembly of spiro $\beta$ -lactams by Rh(II)-catalyzed reaction of diazocarbonyl compounds with azirines/isoxazoles**

Artem A. Golubev, Ilia A. Smetanin, Anastasiya V. Agafonova, Nikolai V. Rostovskii, Alexander F. Khlebnikov, Galina L. Starova and Mikhail S. Novikov\*

St. Petersburg State University, Institute of Chemistry, 7/9 Universitetskaya nab., St. Petersburg, 199034 Russia.

m.novikov@spbu.ru

#### **Table of Content**

|                                                              |    |
|--------------------------------------------------------------|----|
| 1. General experimental details.....                         | 2  |
| 2. Synthesis of isoxazole <b>6f</b> .....                    | 2  |
| 3. $^1\text{H}$ and $^{13}\text{C}$ NMR spectra .....        | 3  |
| 4. X-ray crystal structures of compounds <b>5a,p-r</b> ..... | 29 |
| 5. References.....                                           | 36 |

## 1. General experimental details

Melting points were determined on a melting point apparatus SMP30.  $^1\text{H}$  (400 MHz) and  $^{13}\text{C}$  (100 MHz) NMR spectra were recorded on a Bruker AVANCE 400 spectrometer in  $\text{CDCl}_3$ . Chemical shifts ( $\delta$ ) are reported in ppm downfield from tetramethylsilane. Electrospray ionization (ESI), positive mode, mass spectra were measured on a Bruker MaXis mass spectrometer. Thin-layer chromatography (TLC) was conducted on aluminum sheets precoated with  $\text{SiO}_2$  ALUGRAM SIL G/UV254. Column chromatography was performed on Macherey-Nagel silica gel 60 M (0.04–0.063 mm). Dichloromethane was washed with concentrated  $\text{H}_2\text{SO}_4$ , water, then distilled from  $\text{P}_2\text{O}_5$  and stored over anhydrous  $\text{K}_2\text{CO}_3$ .

## 2. Synthesis of 4-bromo-3-(4-*tert*-butylphenyl)-5-methoxyisoxazole **6f**<sup>1</sup>

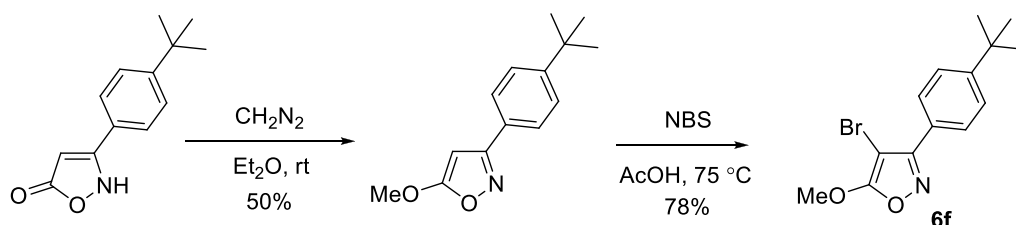

*Synthesis of 3-(4-*tert*-butylphenyl)-5-methoxyisoxazole.* To a stirred suspension of 3-(4-*tert*-butylphenyl)isoxazol-5(4*H*)-one (1.22 g, 5.6 mmol) in anhydrous  $\text{Et}_2\text{O}$  (50 mL) was added dropwise at 0 °C a solution of diazomethane (11.2 mmol) in  $\text{Et}_2\text{O}$ , prepared from *N*-nitroso-*N*-methylurea (1.73 g, 16.8 mmol) and KOH (5.02 g, 89.6 mmol). The resulting mixture was stirred at ambient temperature for 2 h and then concentrated under reduced pressure. The residue was purified by column chromatography on silica gel (EtOAc–hexane) to give 3-(4-*tert*-butylphenyl)-5-methoxyisoxazole (648 mg, 50%) as a colorless solid. Mp 74–76 °C ( $\text{Et}_2\text{O}$ –hexane).  $^1\text{H}$  NMR (400 MHz,  $\text{CDCl}_3$ )  $\delta$  7.73–7.68 (m, 2H), 7.51–7.46 (m, 2H), 5.53 (s, 1H), 4.06 (s, 3H), 1.37 (s, 9H);  $^{13}\text{C}$  NMR (100 MHz,  $\text{CDCl}_3$ )  $\delta$  174.3, 164.1, 153.3, 126.7, 126.2, 125.7, 75.3, 58.7, 34.8, 31.2. HRMS–ESI  $[\text{M}+\text{H}]^+$  calcd for  $\text{C}_{14}\text{H}_{18}\text{NO}_2^+$ : 232.1332; found 232.1330.

*Synthesis of 4-bromo-3-(4-*tert*-butylphenyl)-5-methoxyisoxazole.* A solution of 3-(4-*tert*-butylphenyl)-5-methoxyisoxazole (462 mg, 2 mmol) and *N*-bromosuccinimide (392 mg, 2.2 mmol) in AcOH (10 mL) was heated at 75 °C under stirring for 40 min. The reaction mixture was diluted with  $\text{H}_2\text{O}$  (30 mL) and extracted with  $\text{CH}_2\text{Cl}_2$  (3×10 mL). The combined organic layers were dried over  $\text{Na}_2\text{SO}_4$  and concentrated under reduced pressure. The residue was purified by column chromatography on silica gel (EtOAc–hexane) to give isoxazole **6** (484 mg, 78%) as a colorless solid. Mp 87–89 °C ( $\text{Et}_2\text{O}$ –hexane).  $^1\text{H}$  NMR (400 MHz,  $\text{CDCl}_3$ )  $\delta$  7.82–7.76 (m, 2H), 7.54–7.50 (m, 2H), 4.23 (s, 3H), 1.38 (s, 9H);  $^{13}\text{C}$  NMR (100 MHz,  $\text{CDCl}_3$ )  $\delta$  169.2, 162.4, 153.5, 127.6, 125.6, 125.4, 66.7, 58.4, 34.9, 31.2. HRMS–ESI  $[\text{M}+\text{H}]^+$  calcd for  $\text{C}_{14}\text{H}_{17}^{79}\text{BrNO}_2^+$ : 310.0437; found 310.0444.

### 3. $^1\text{H}$ and $^{13}\text{C}$ NMR spectra

#### 3-(4-(*tert*-Butyl)phenyl)-5-methoxyisoxazole

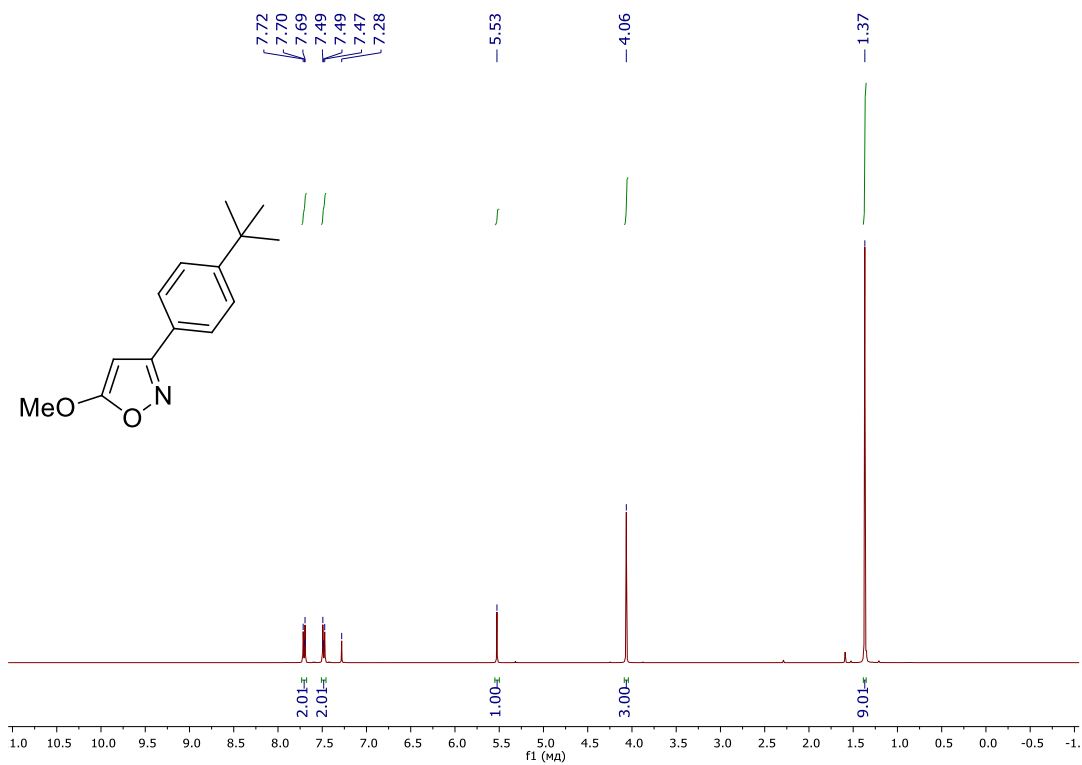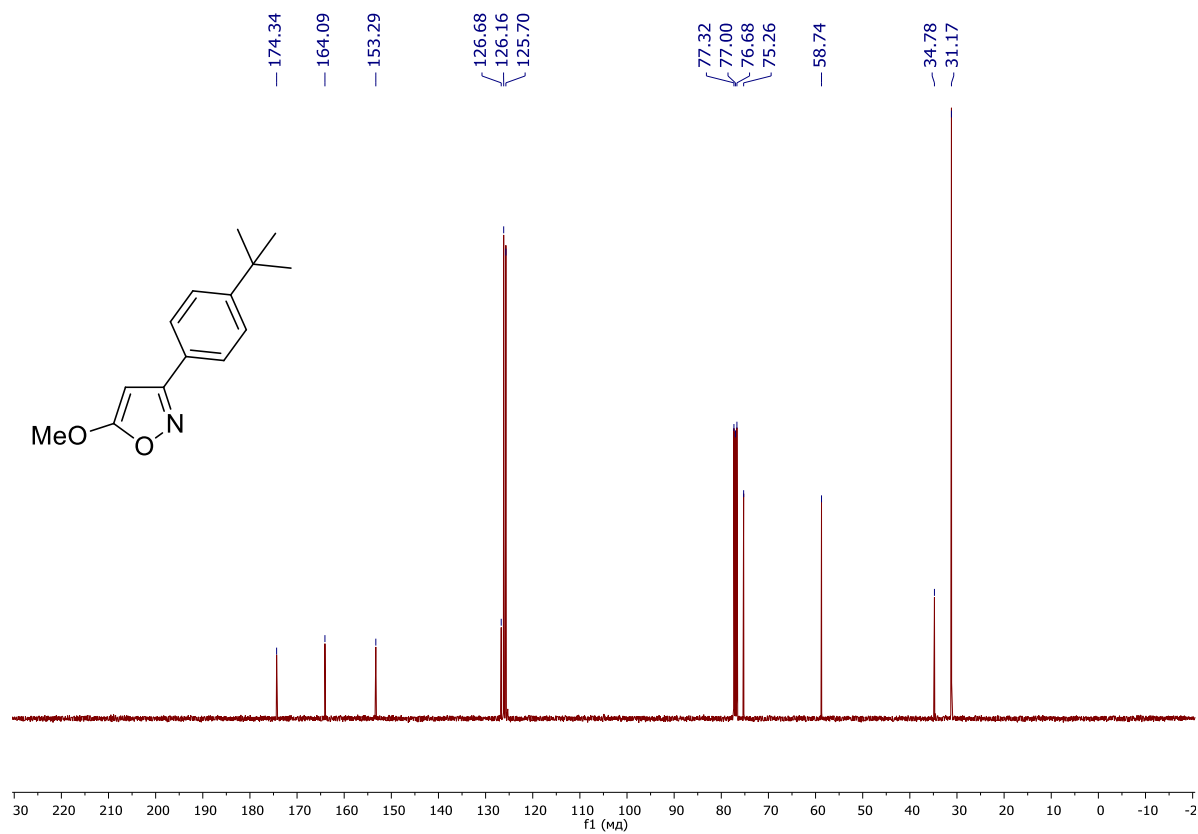

Methyl *(E)*-2-bromo-3-(2,2-dimethyl-4,6-dioxo-1,3-dioxan-5-ylideneamino)-3-phenylacrylate (3a)

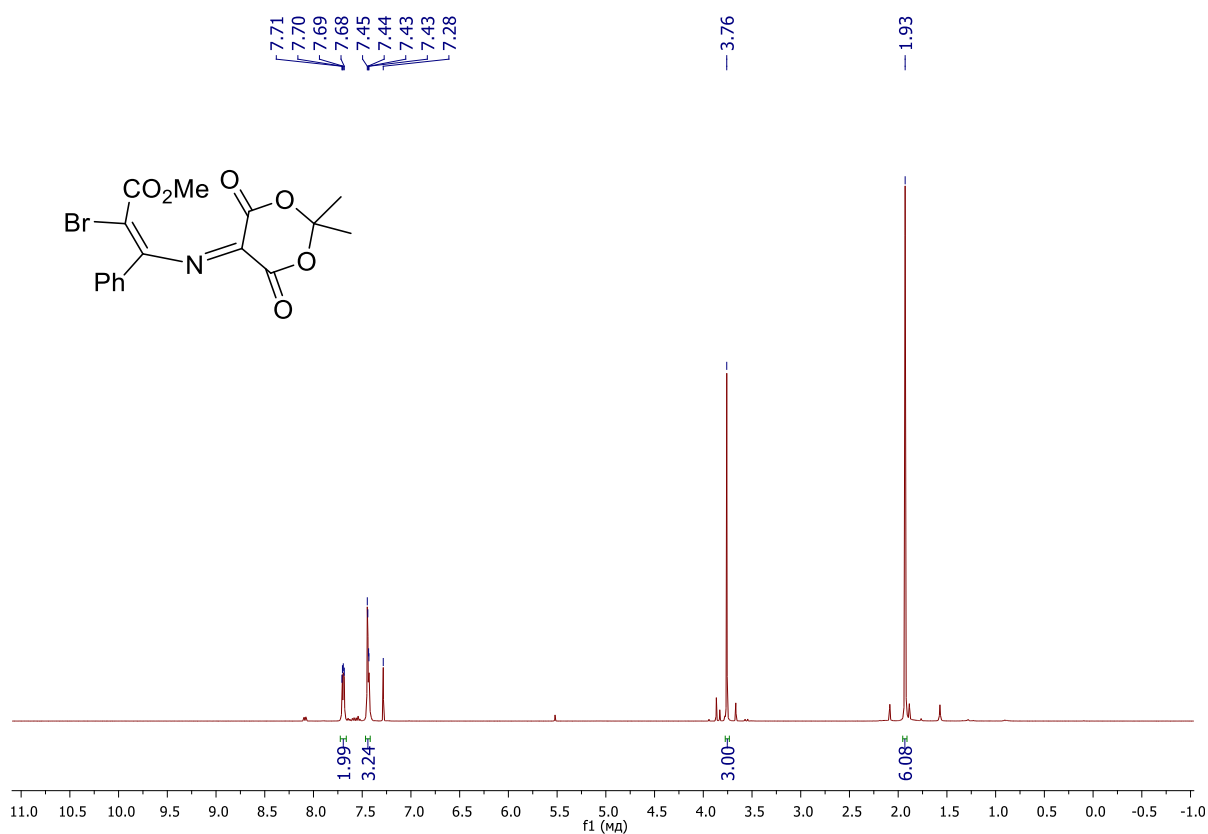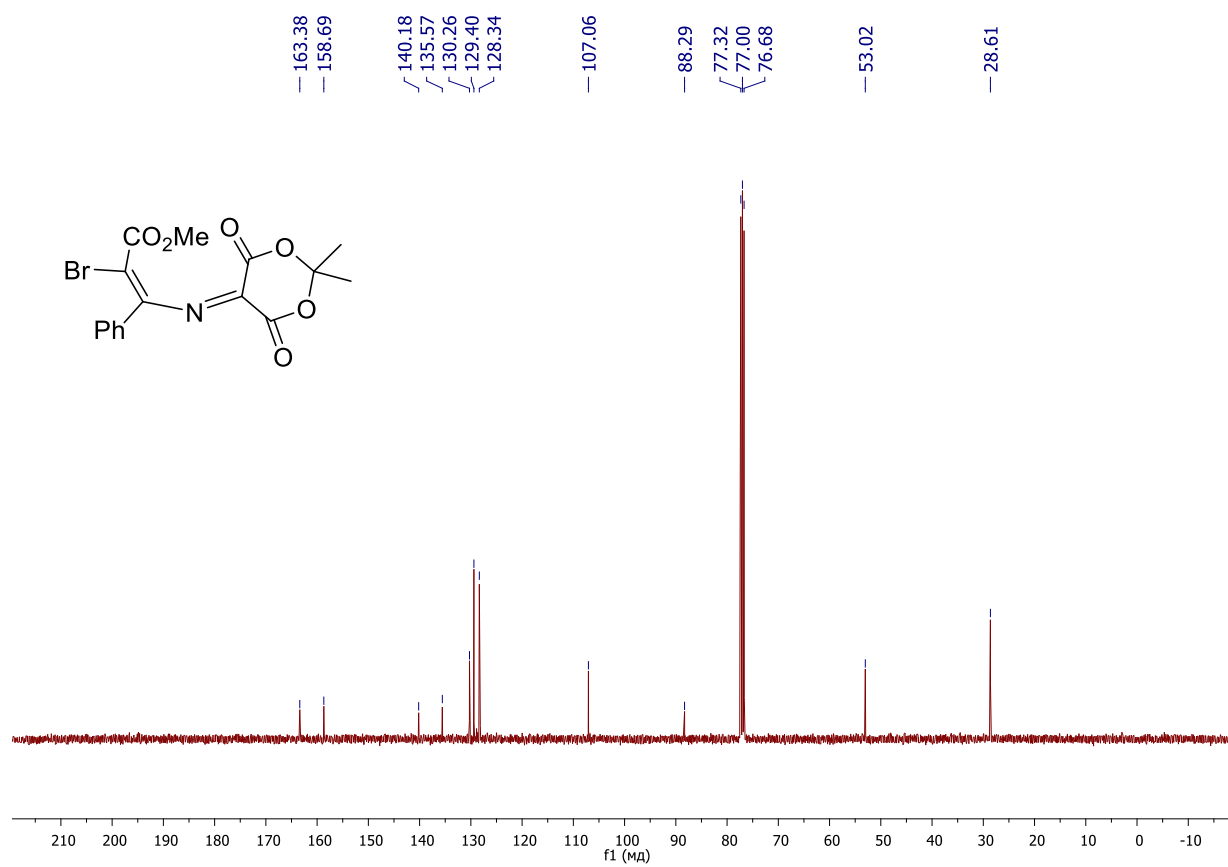

**Methyl 3-bromo-7,7-dimethyl-5,9-dioxo-2-phenyl-6,8-dioxa-1-azaspiro[3.5]non-1-ene-3-carboxylate (4a)**

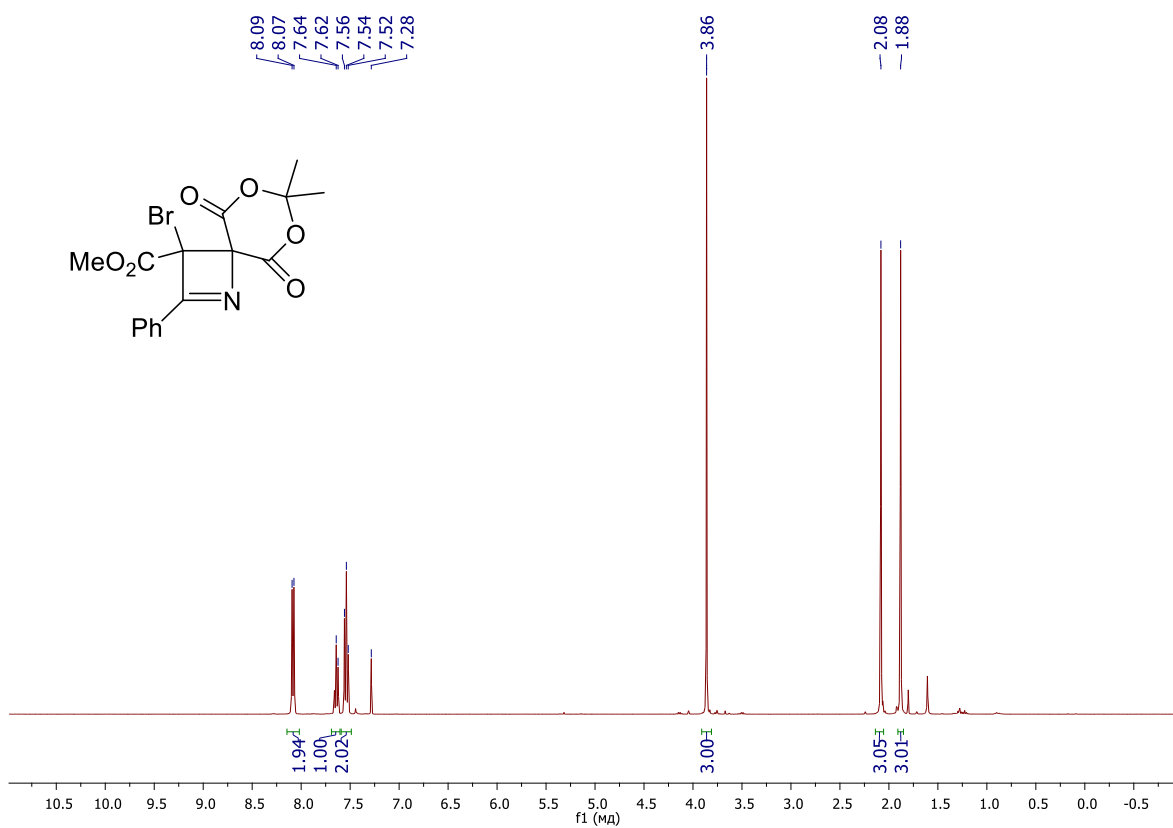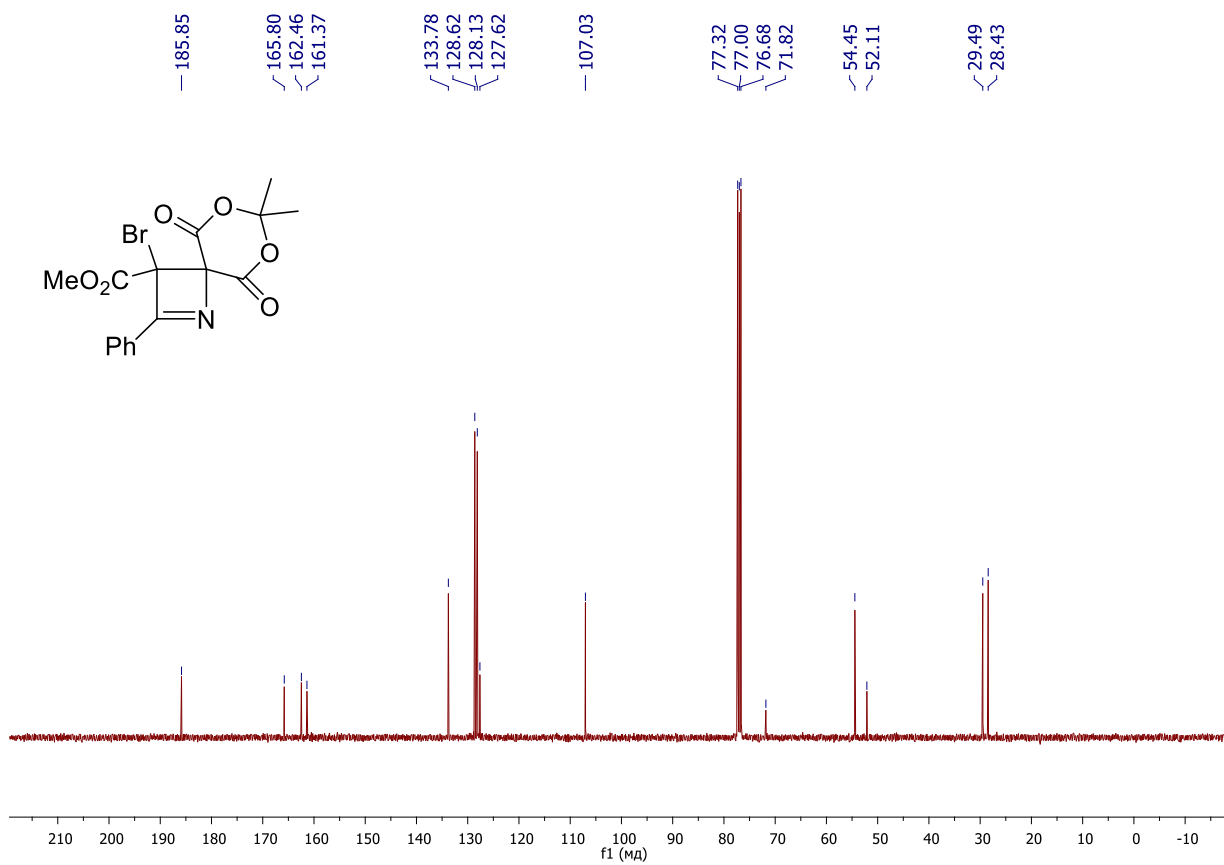

**Methyl (*E*)-2-bromo-3-phenyl-3-(2,2,9,9-tetramethyl-4,7,11,13-tetraoxo-1,3,8,10-tetraoxa-12-azadispiro[4.0.5<sup>6</sup>.2<sup>5</sup>]tridecan-12-yl)acrylate (5a)**

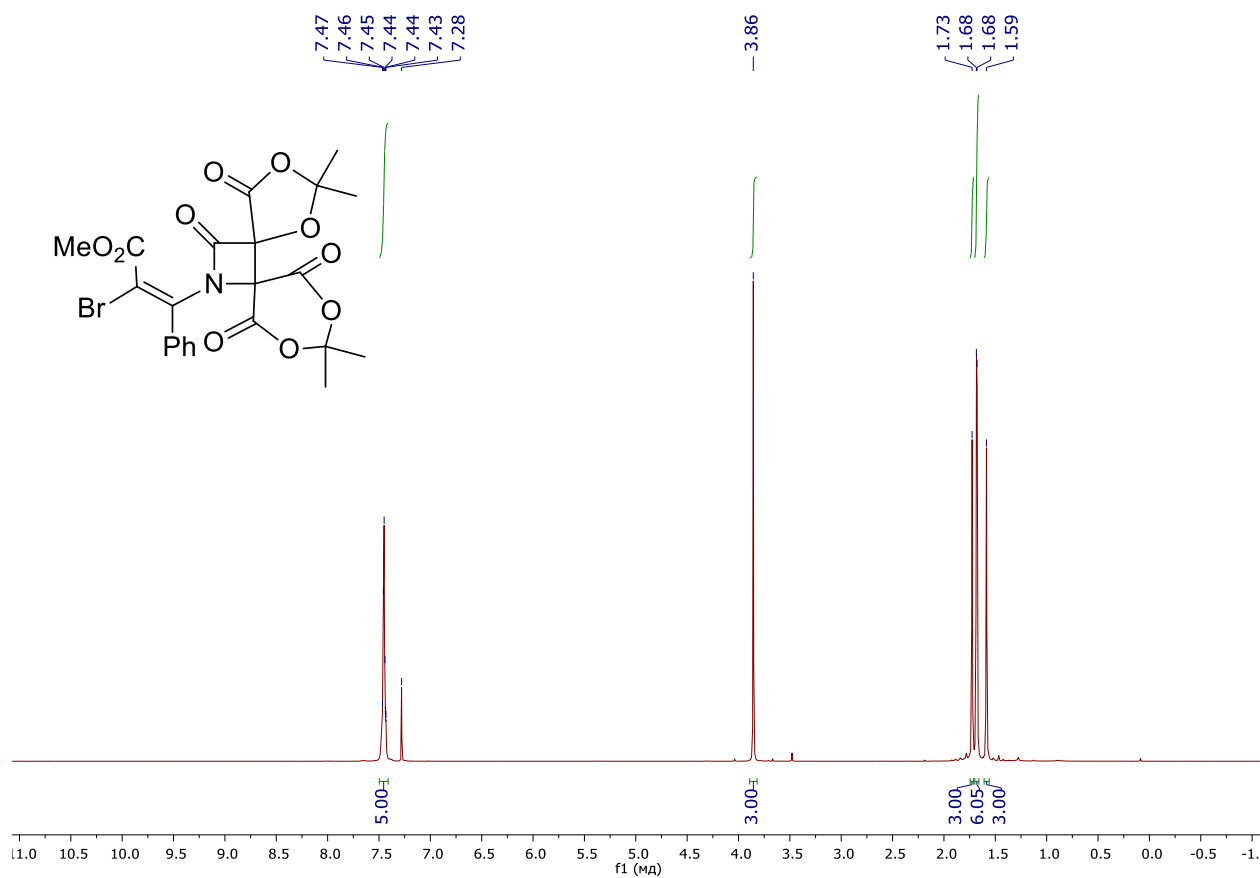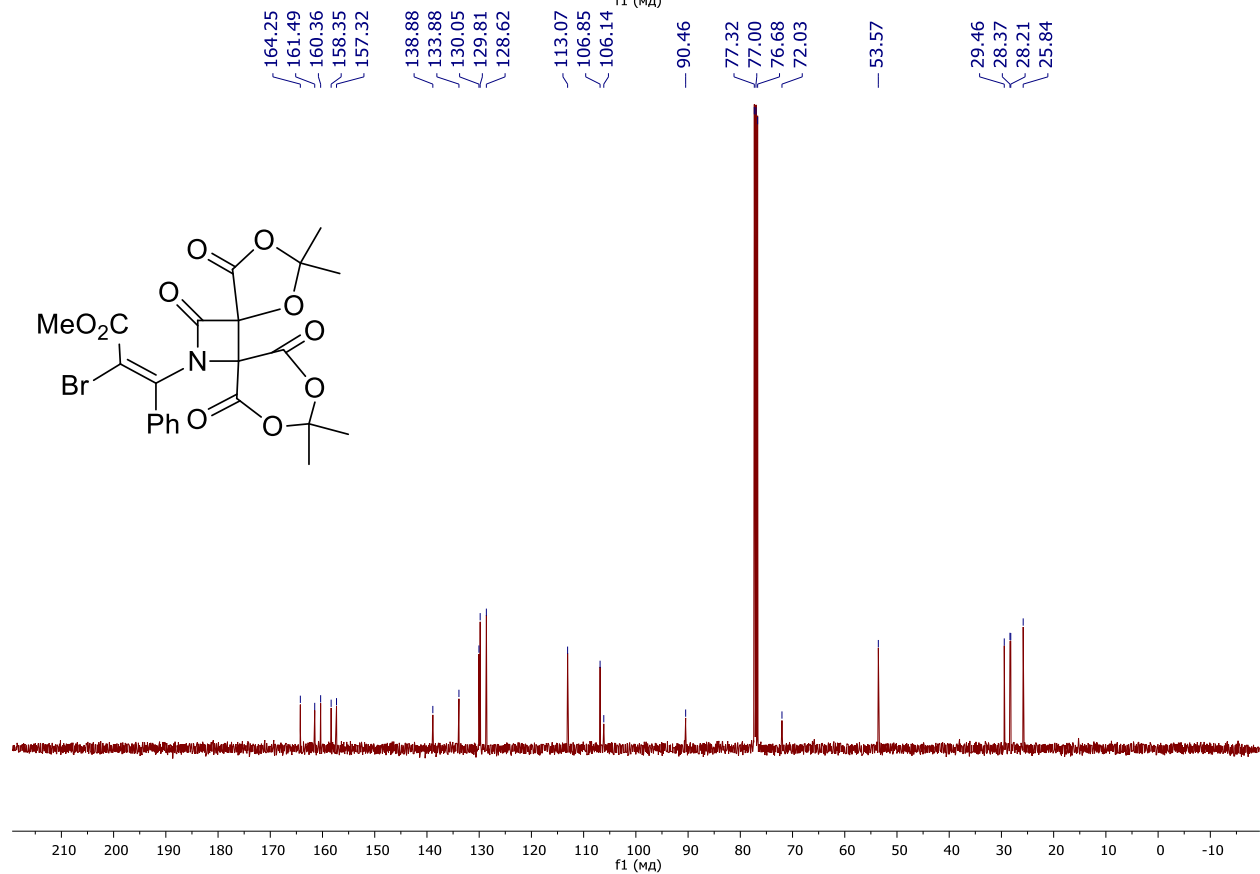

**Methyl (*E*)-2-bromo-3-(4-methylphenyl)-3-(2,2,9,9-tetramethyl-4,7,11,13-tetraoxo-1,3,8,10-tetraoxa-12-azadispiro[4.0.5<sup>6</sup>.2<sup>5</sup>]tridecan-12-yl)acrylate (5b)**

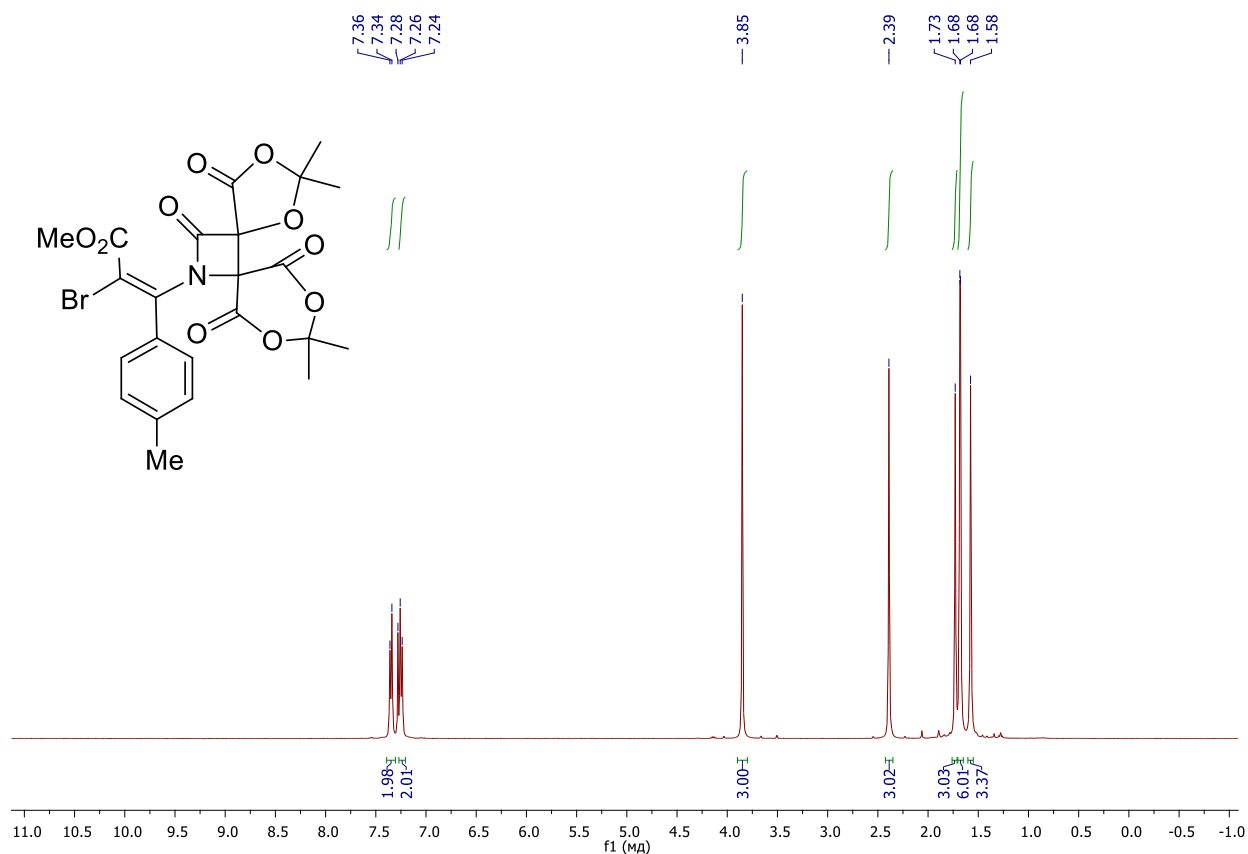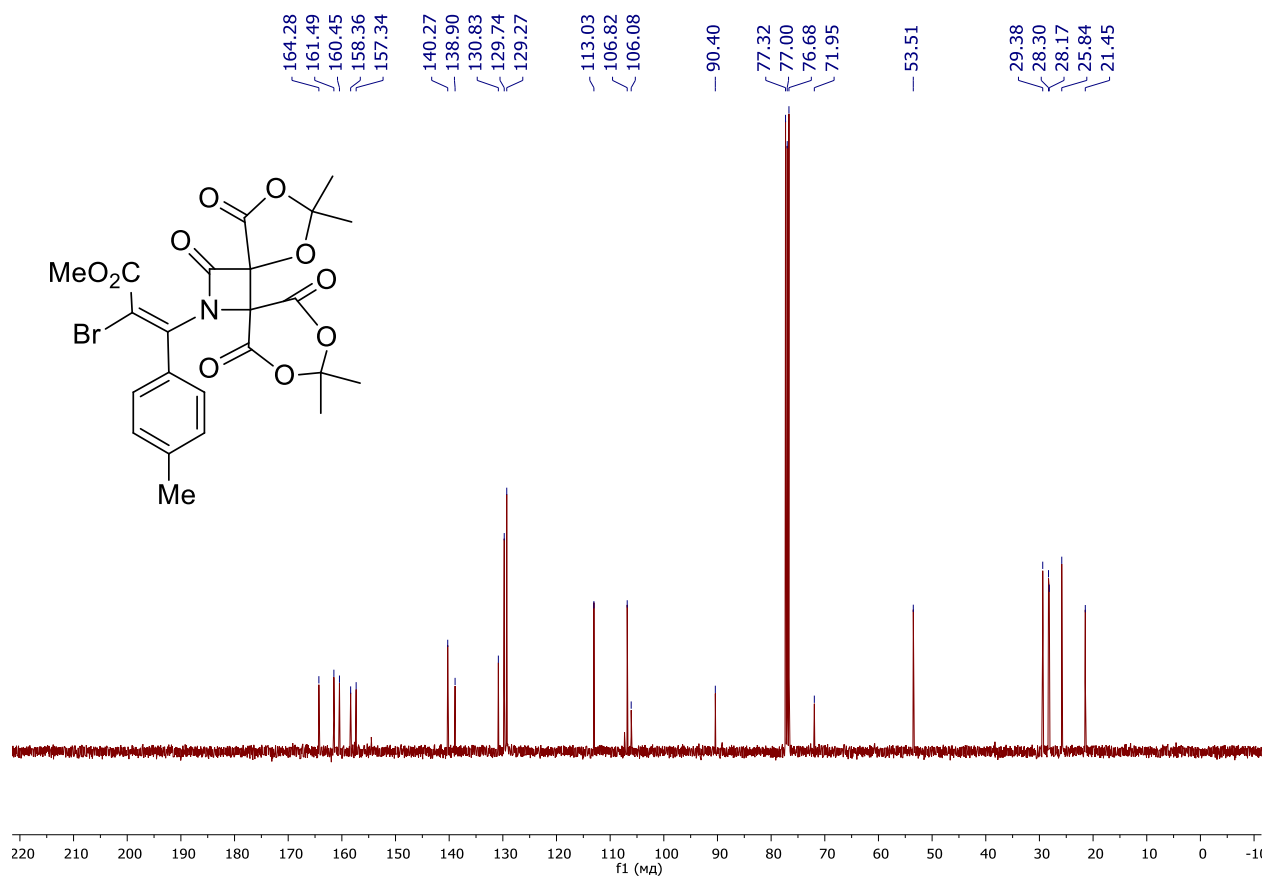

**Methyl (*E*)-2-bromo-3-(4-chlorophenyl)-3-(2,2,9,9-tetramethyl-4,7,11,13-tetraoxo-1,3,8,10-tetraoxa-12-azadispiro[4.0.5<sup>6</sup>.2<sup>5</sup>]tridecan-12-yl)acrylate (5c)**

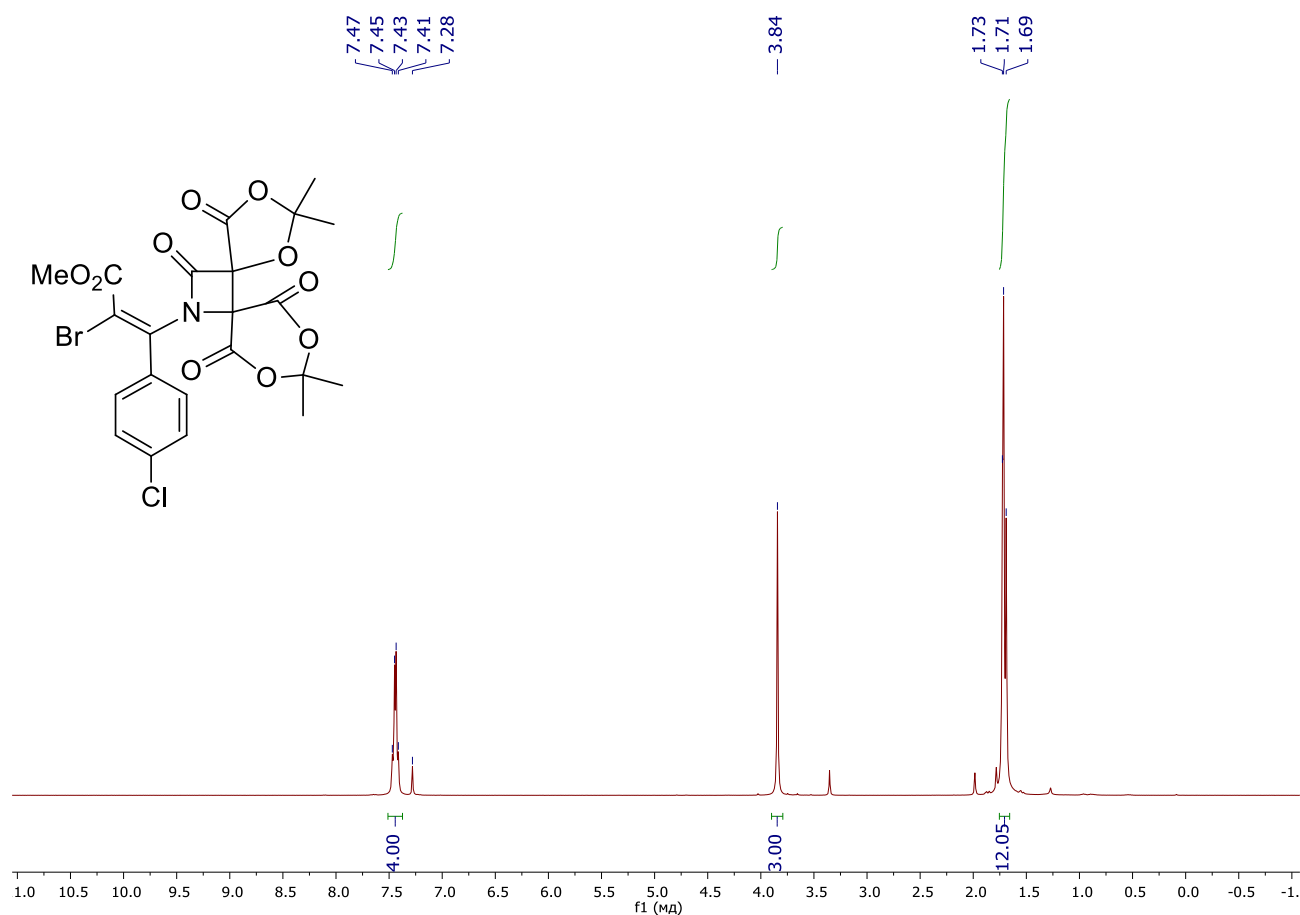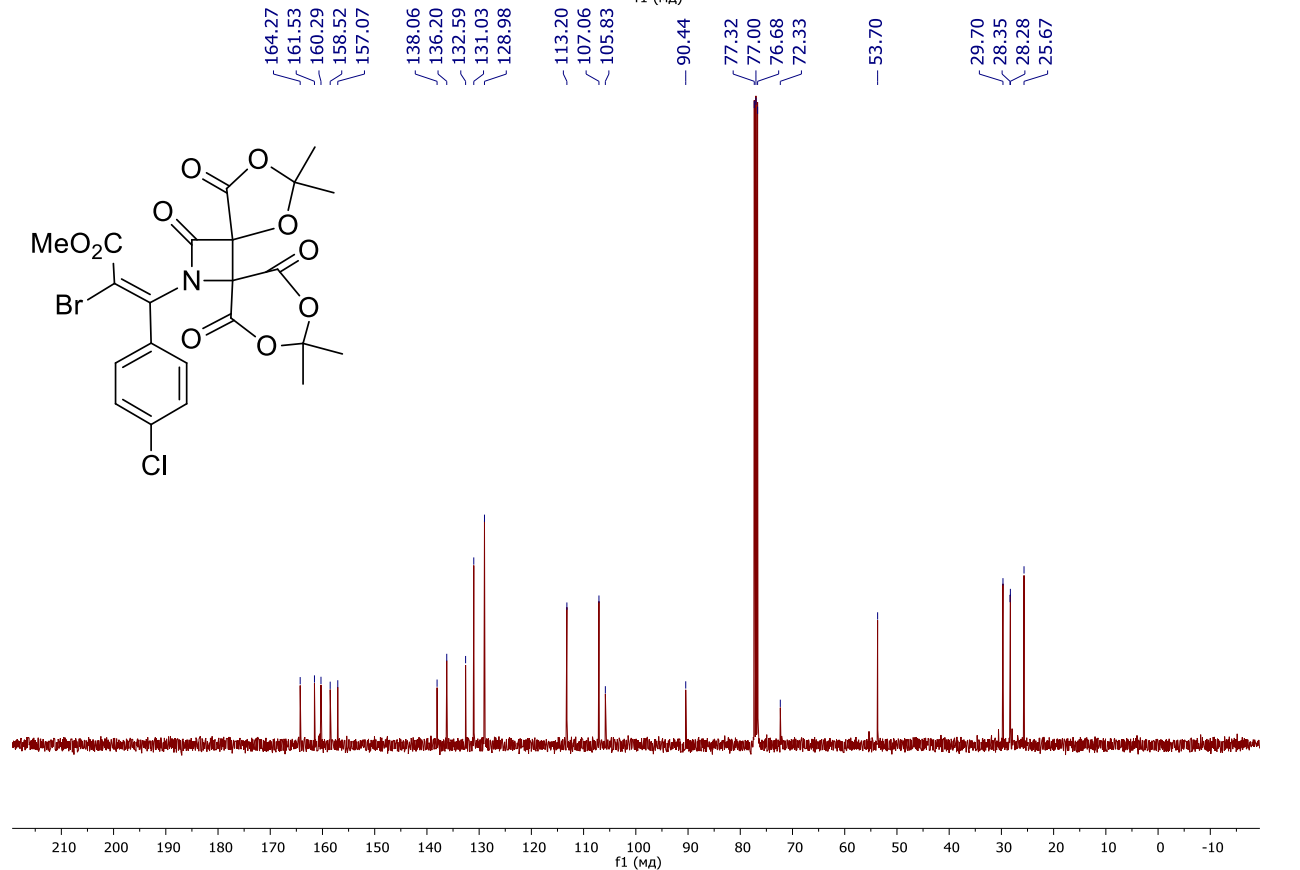



**S-Phenyl (*E*)-2-bromo-3-phenyl-3-(2,2,9,9-tetramethyl-4,7,11,13-tetraoxo-1,3,8,10-tetraoxa-12-azadispiro[4.0.5<sup>6</sup>.2<sup>5</sup>]tridecan-12-yl)prop-2-enethioate (5d)**

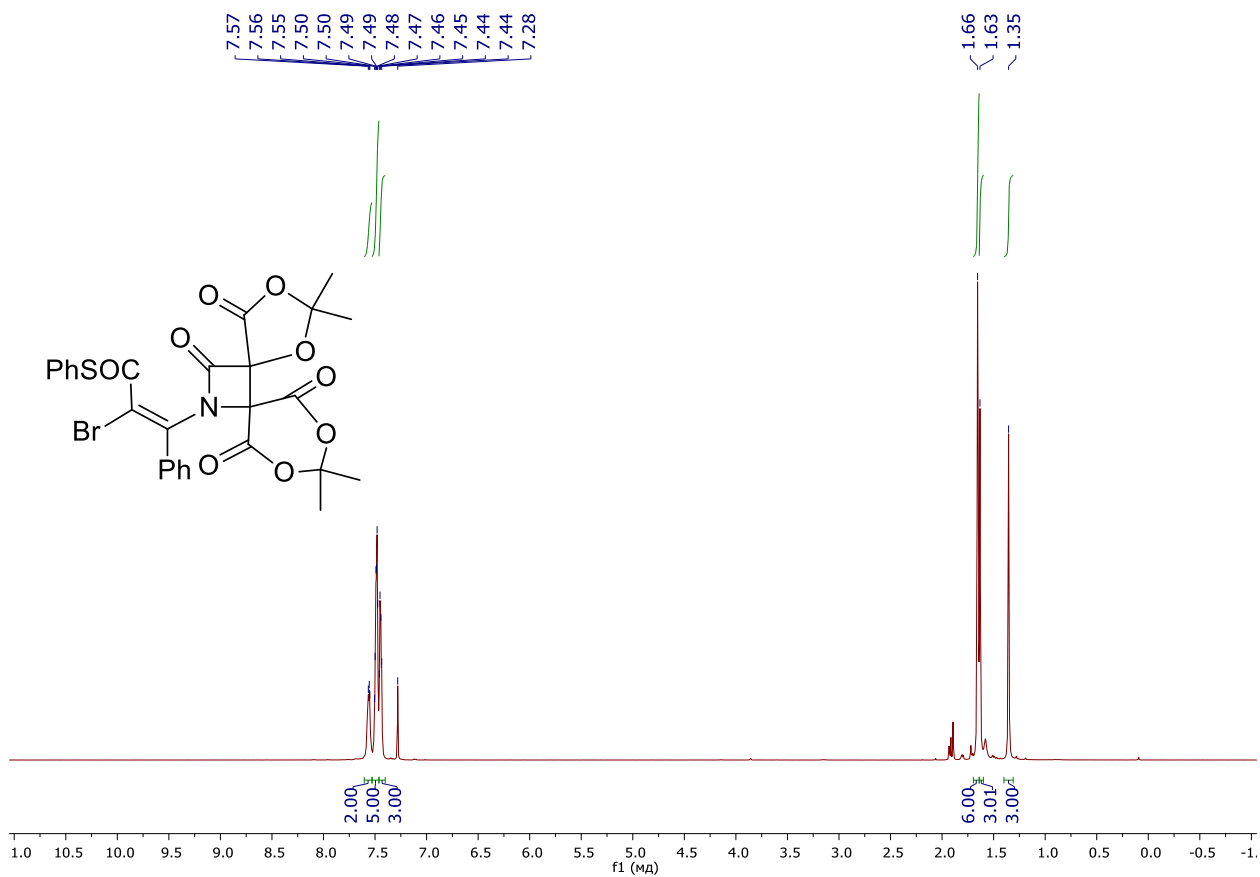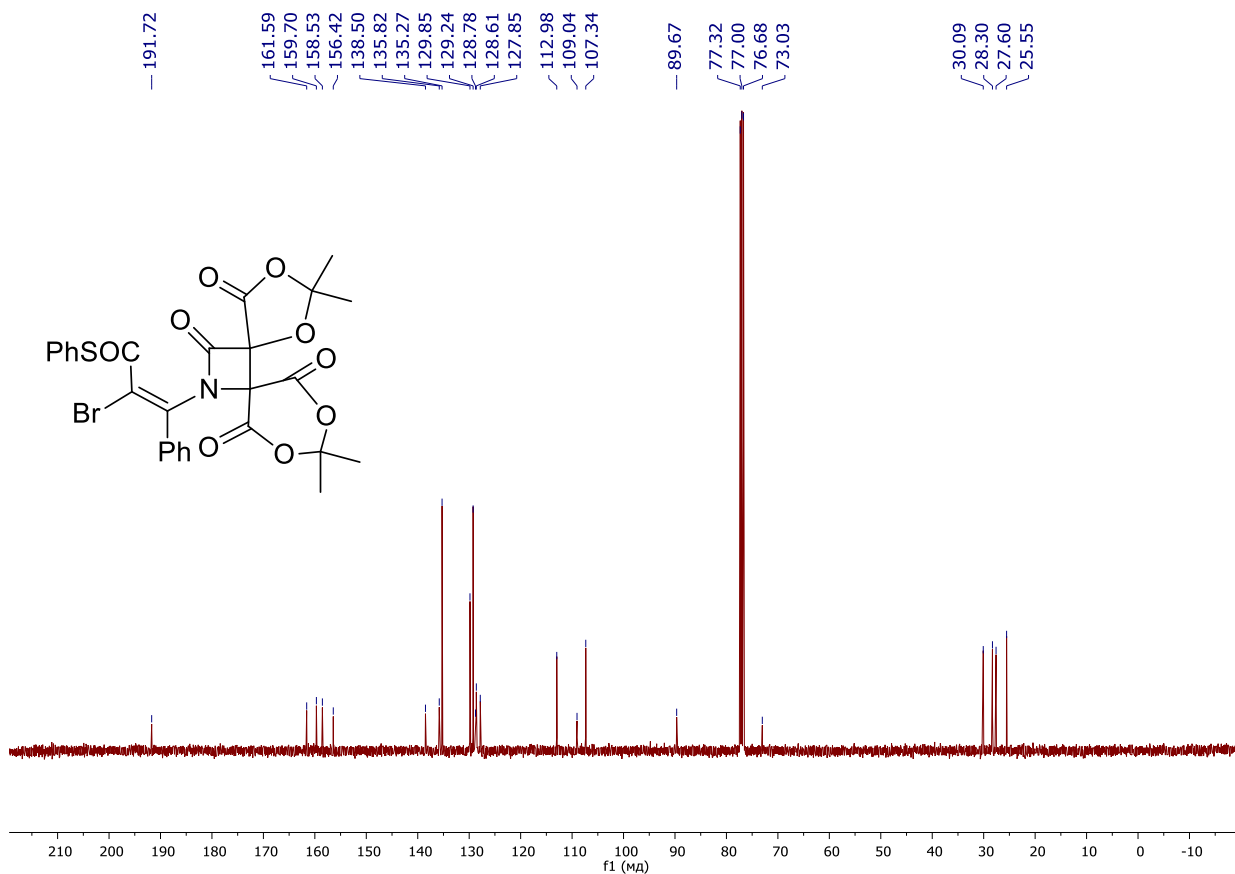

Methyl (E)-2-bromo-3-(2,2,9,9-tetramethyl-4,7,11,13-tetraoxo-1,3,8,10-tetraoxa-12-azadispiro[4.0.5<sup>6</sup>.2<sup>5</sup>]tridecan-12-yl)but-2-enoate (5e)

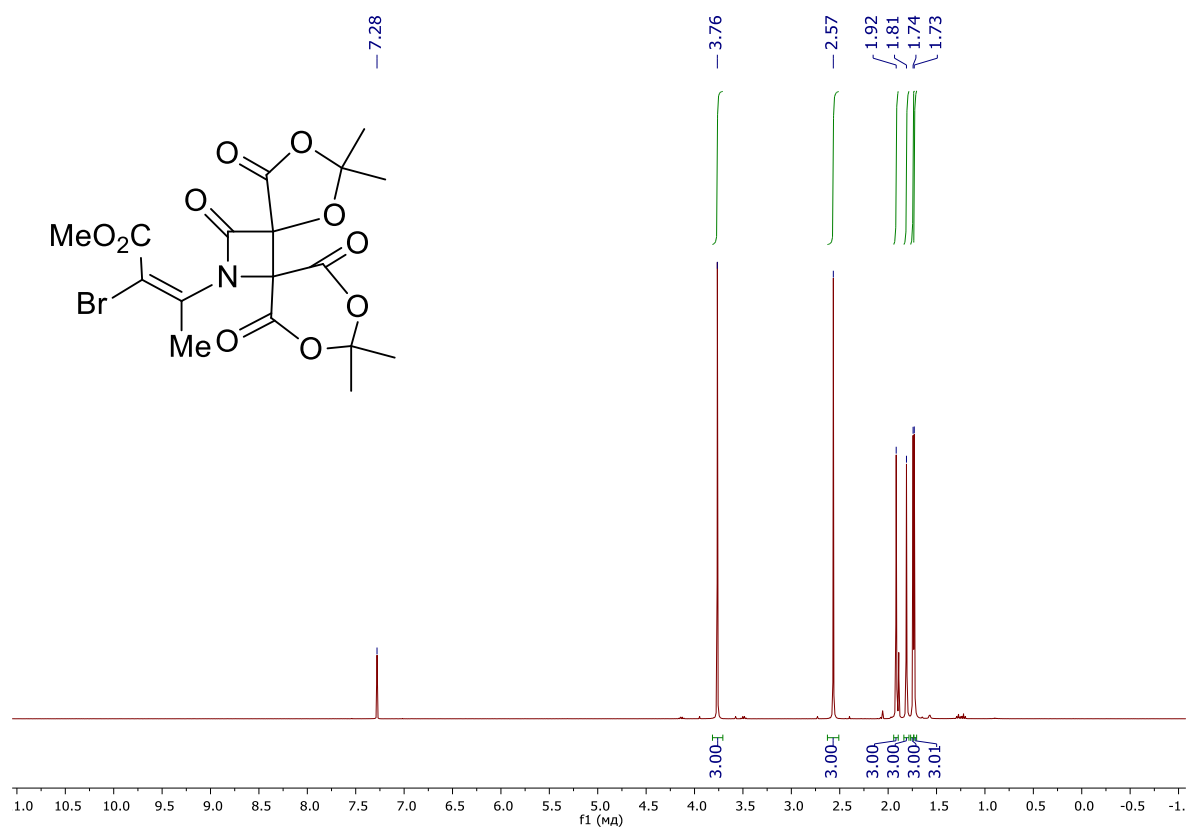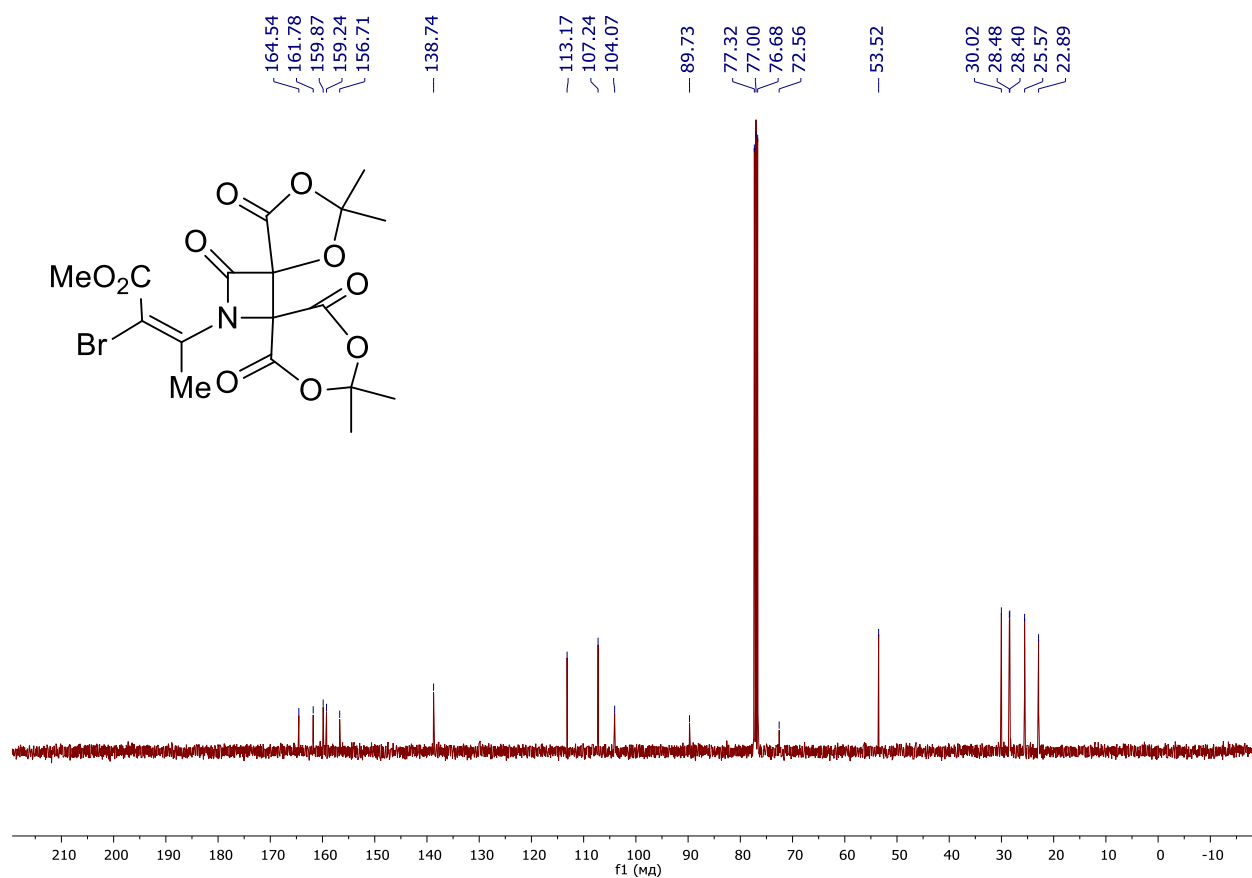

**Methyl (E)-2-chloro-3-phenyl-3-(2,2,9,9-tetramethyl-4,7,11,13-tetraoxo-1,3,8,10-tetraoxa-12-azadispiro[4.0.5<sup>6</sup>.2<sup>5</sup>]tridecan-12-yl)acrylate (5f)**

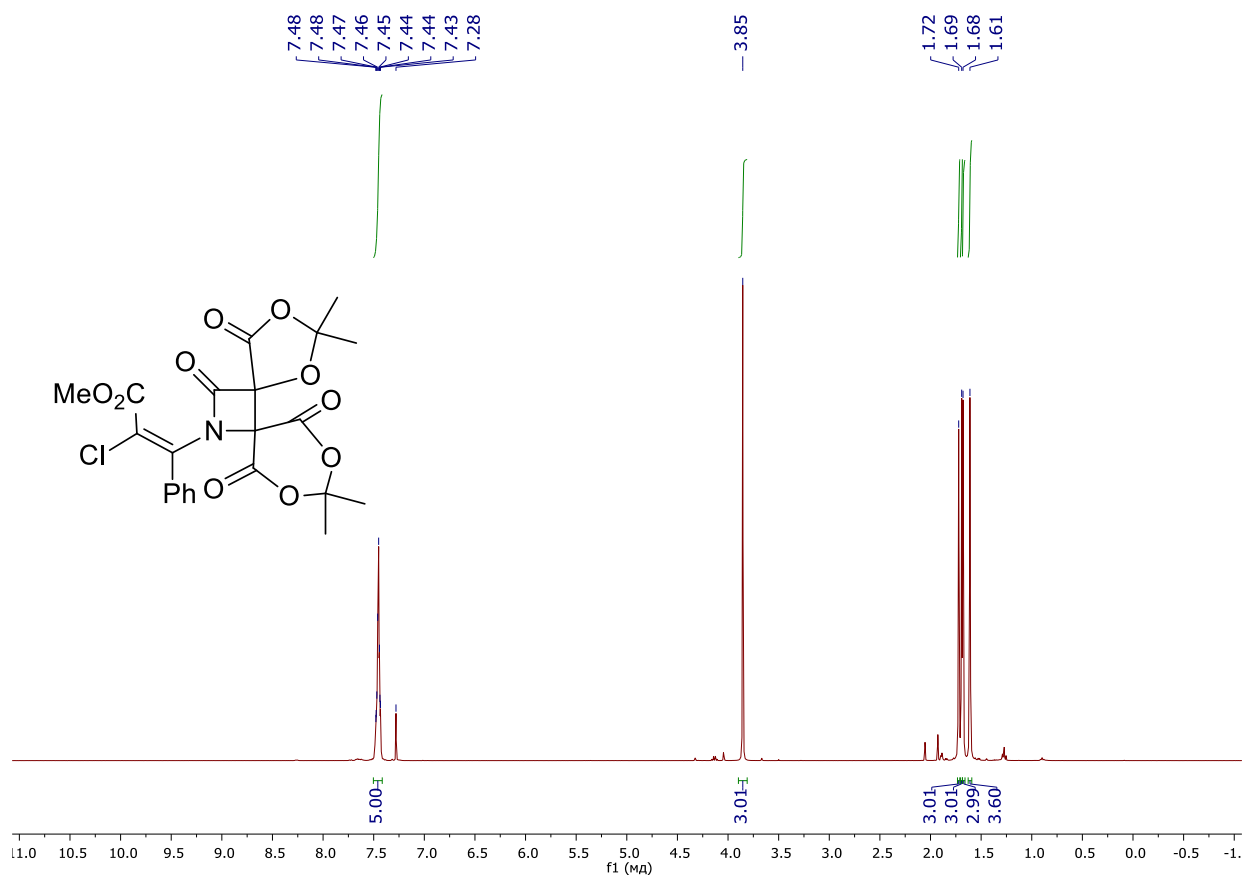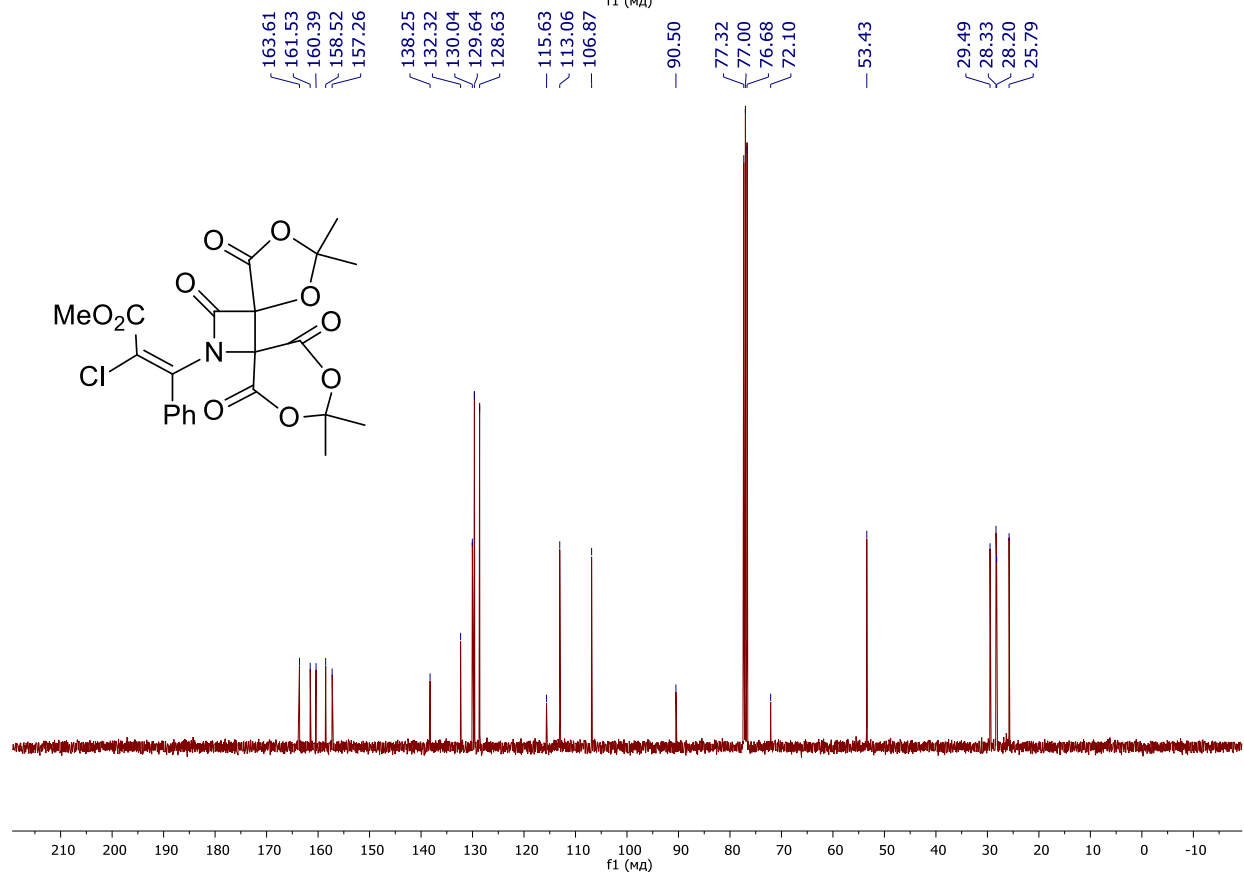

Methyl (Z)-3-phenyl-3-(2,2,9,9-tetramethyl-4,7,11,13-tetraoxo-1,3,8,10-tetraoxa-12-azadispiro[4.0.5<sup>6</sup>.2<sup>5</sup>]tridecan-12-yl)acrylate (Z-5g)

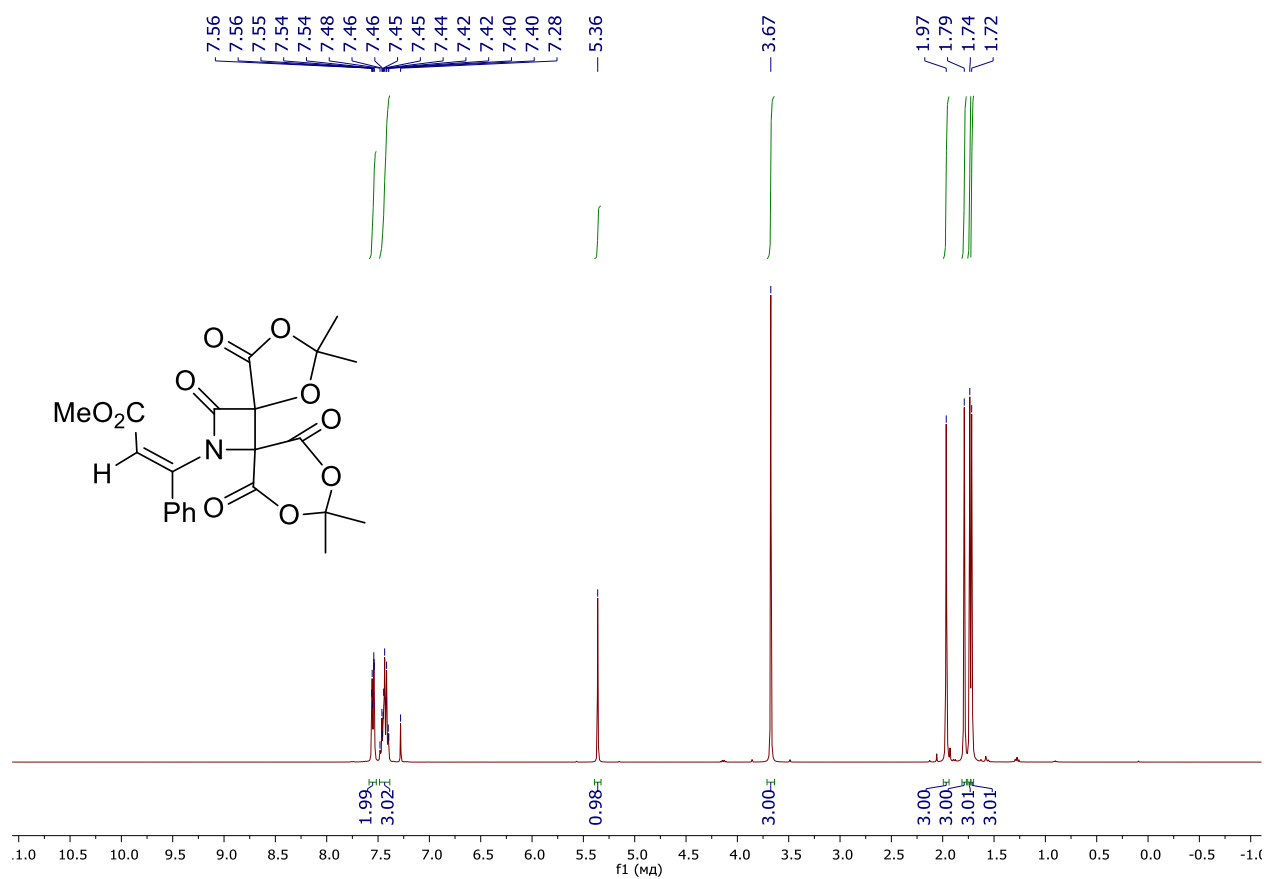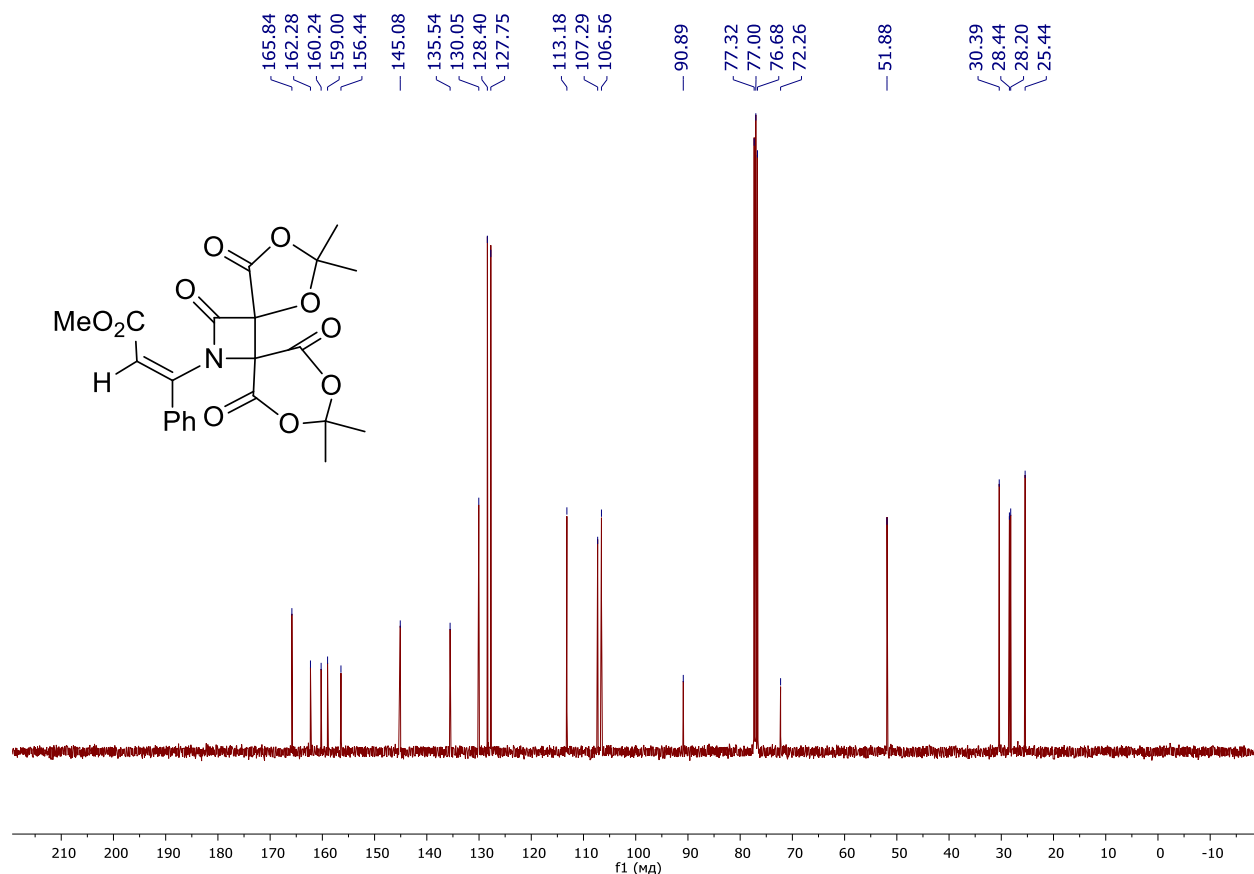

**Methyl (E)-3-phenyl-3-(2,2,9,9-tetramethyl-4,7,11,13-tetraoxo-1,3,8,10-tetraoxa-12-azadispiro[4.0.5<sup>6</sup>.2<sup>5</sup>]tridecan-12-yl)acrylate (E-5g)**

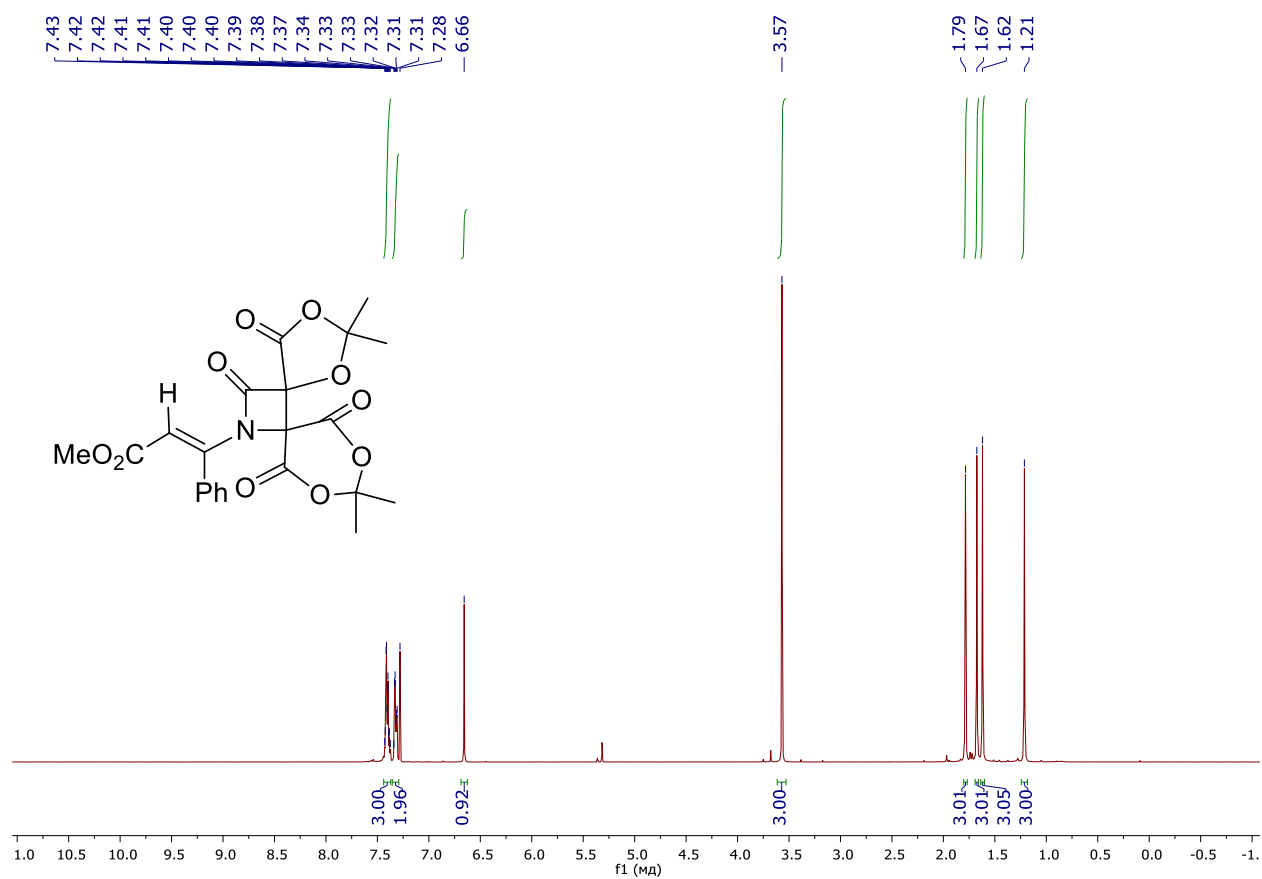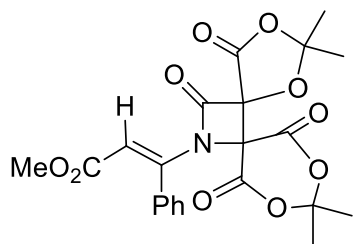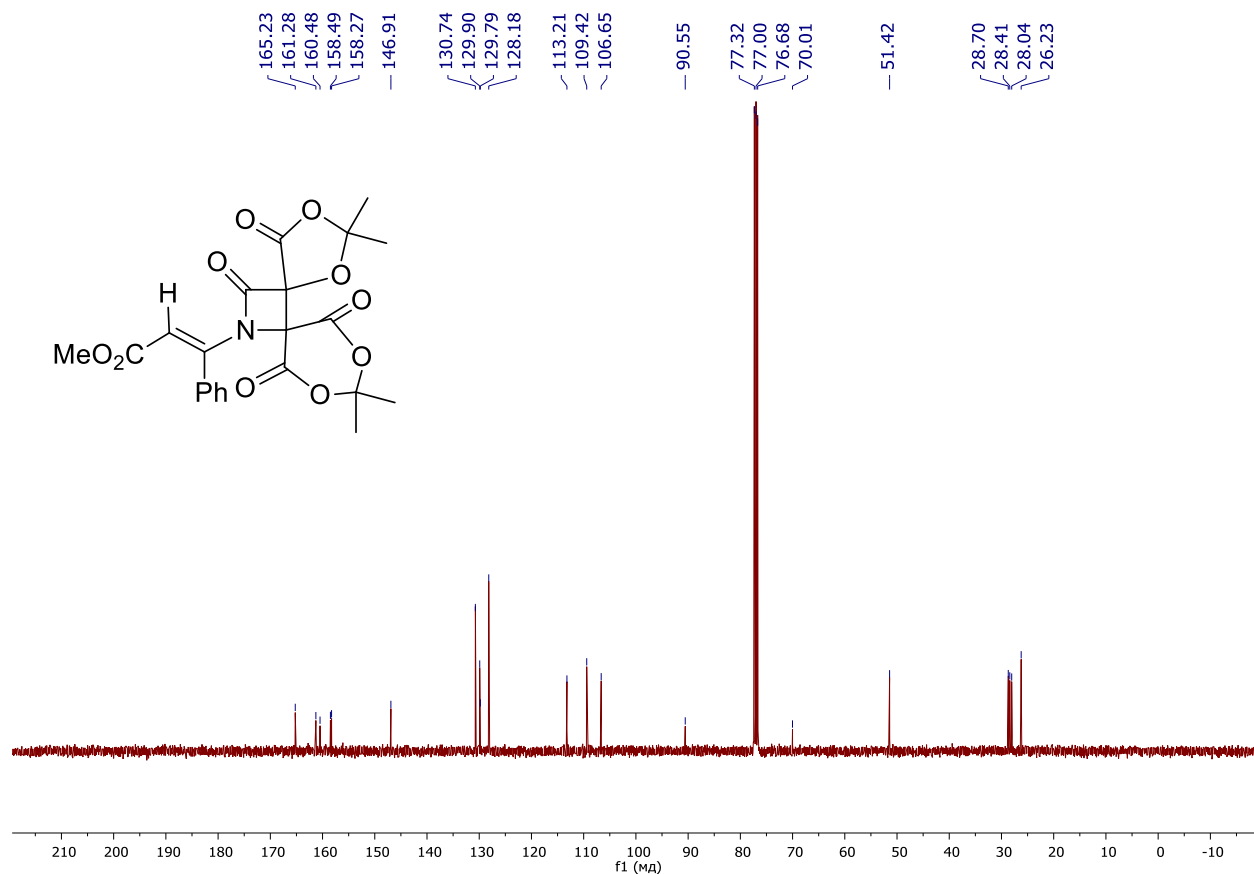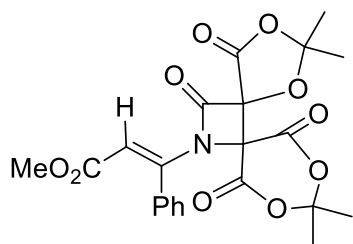

Methyl (Z)-3-(4-methoxyphenyl)-3-(2,2,9,9-tetramethyl-4,7,11,13-tetraoxo-1,3,8,10-tetraoxa-12-azadispiro[4.0.5<sup>6</sup>.2<sup>5</sup>]tridecan-12-yl)acrylate (5h)

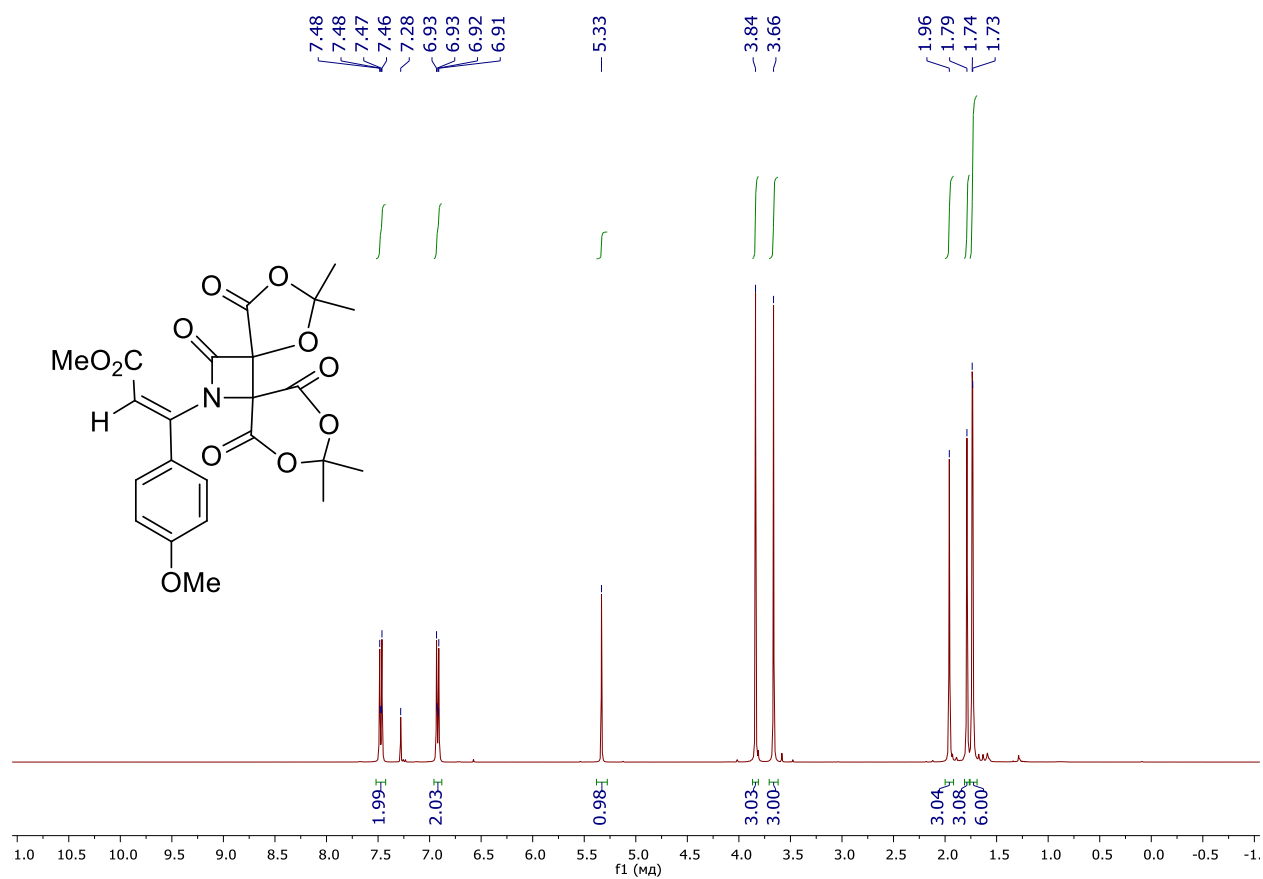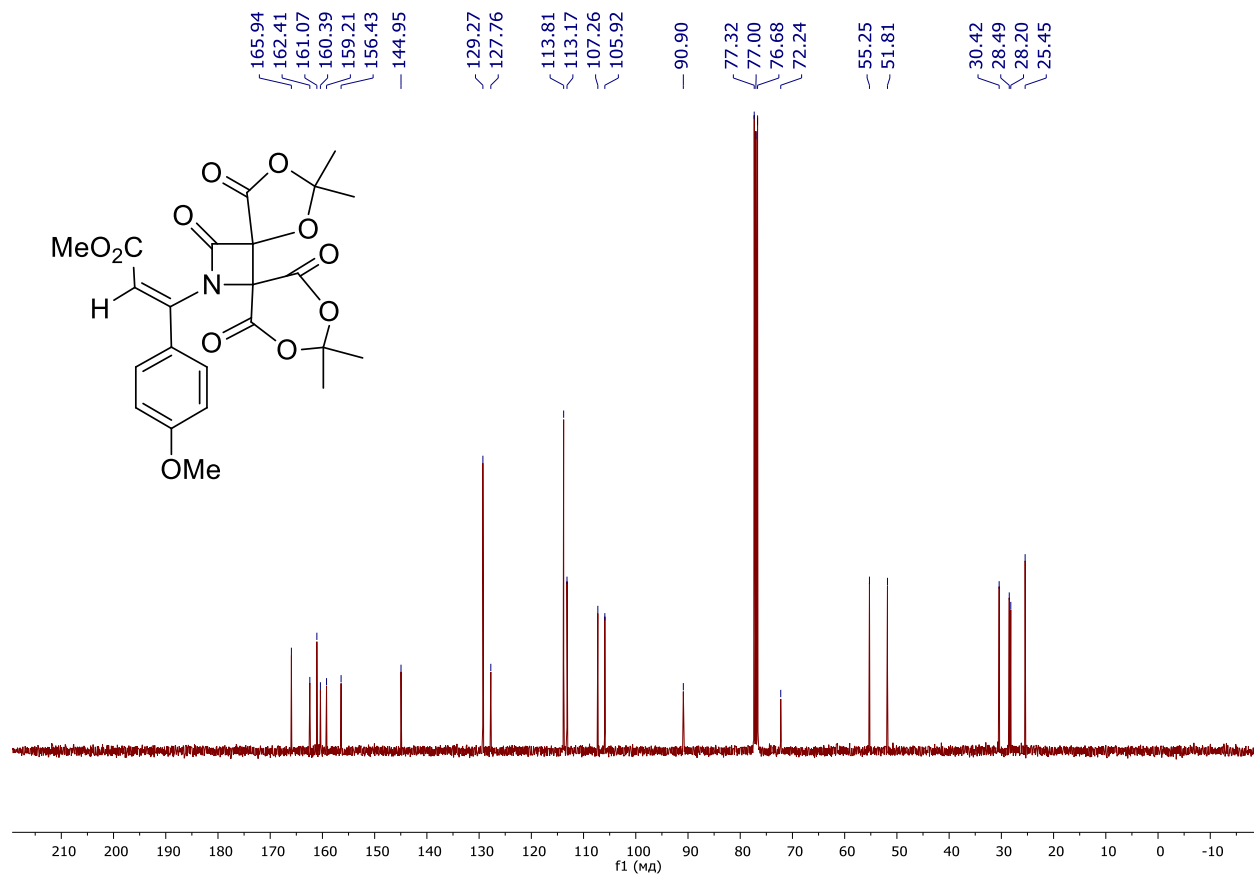

**Dimethyl 2-(phenyl(2,2,9,9-tetramethyl-4,7,11,13-tetraoxo-1,3,8,10-tetraoxa-12-azadispiro[4.0.5<sup>6</sup>.2<sup>5</sup>]tridecan-12-yl)methylene)malonate (5i)**

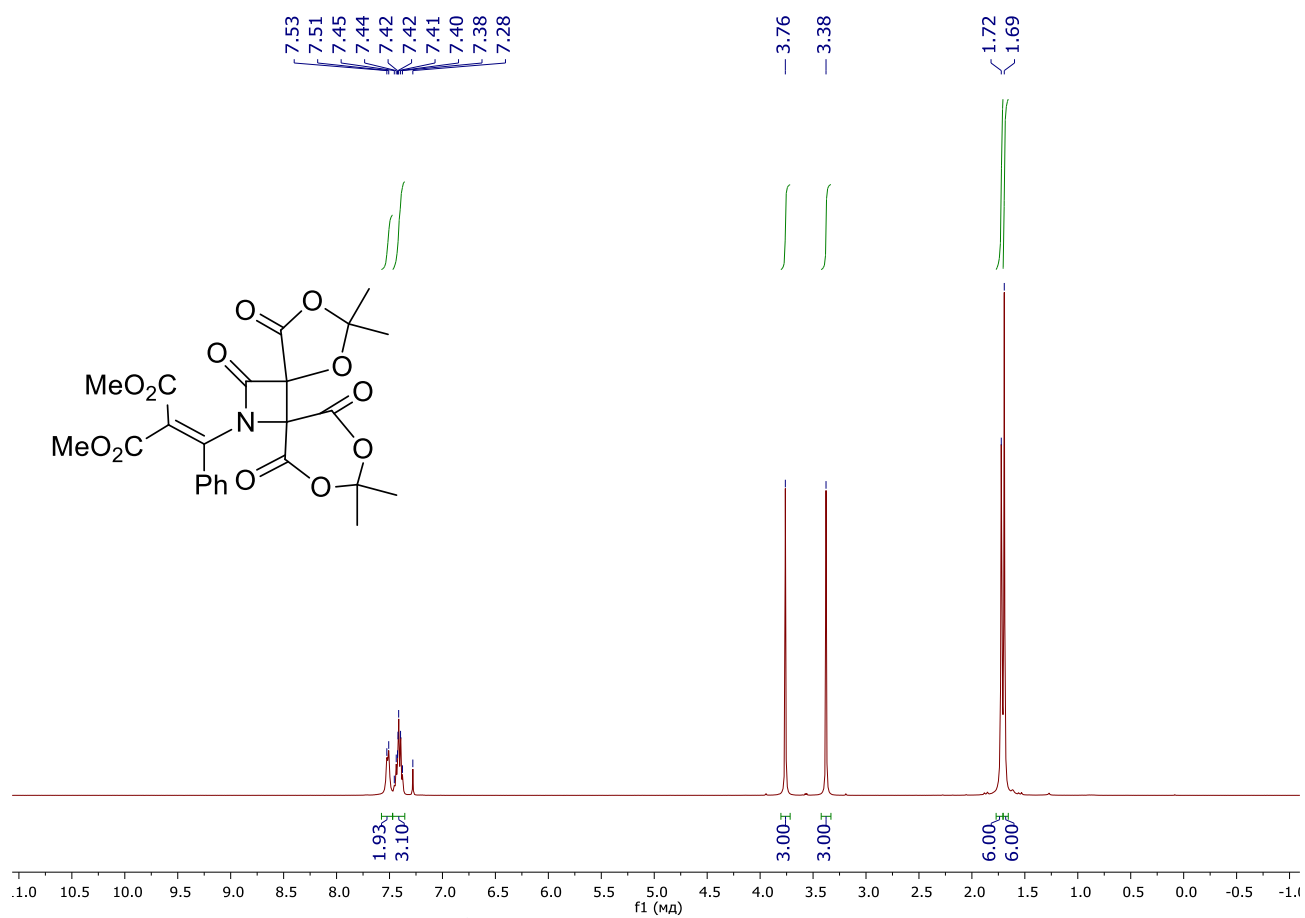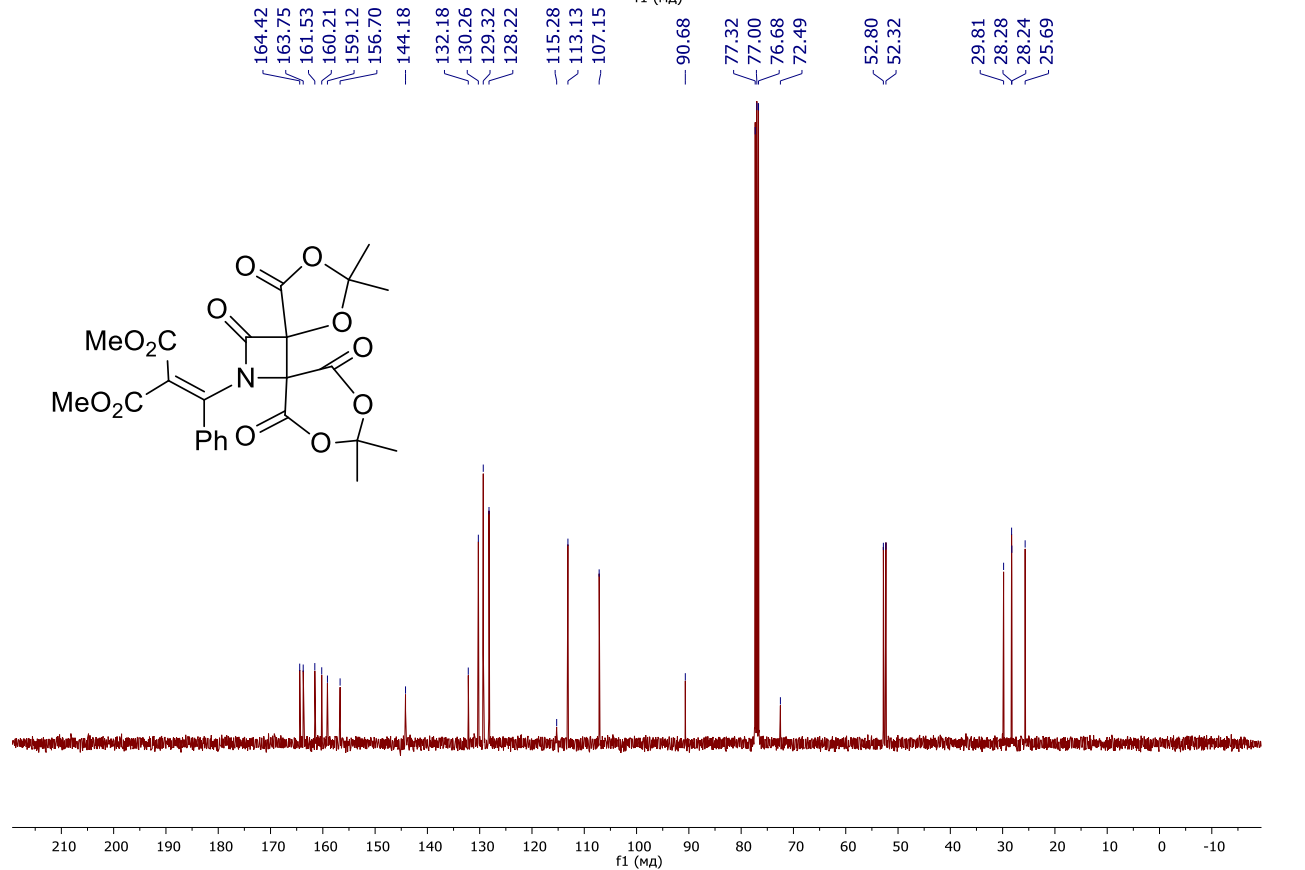

**Dimethyl (E)-2-(2-bromo-3-methoxy-3-oxo-1-phenylprop-1-en-1-yl)-6,6-dimethyl-3,8-dioxo-5,7-dioxo-2-azaspiro[3.4]octane-1,1-dicarboxylate (5j)**

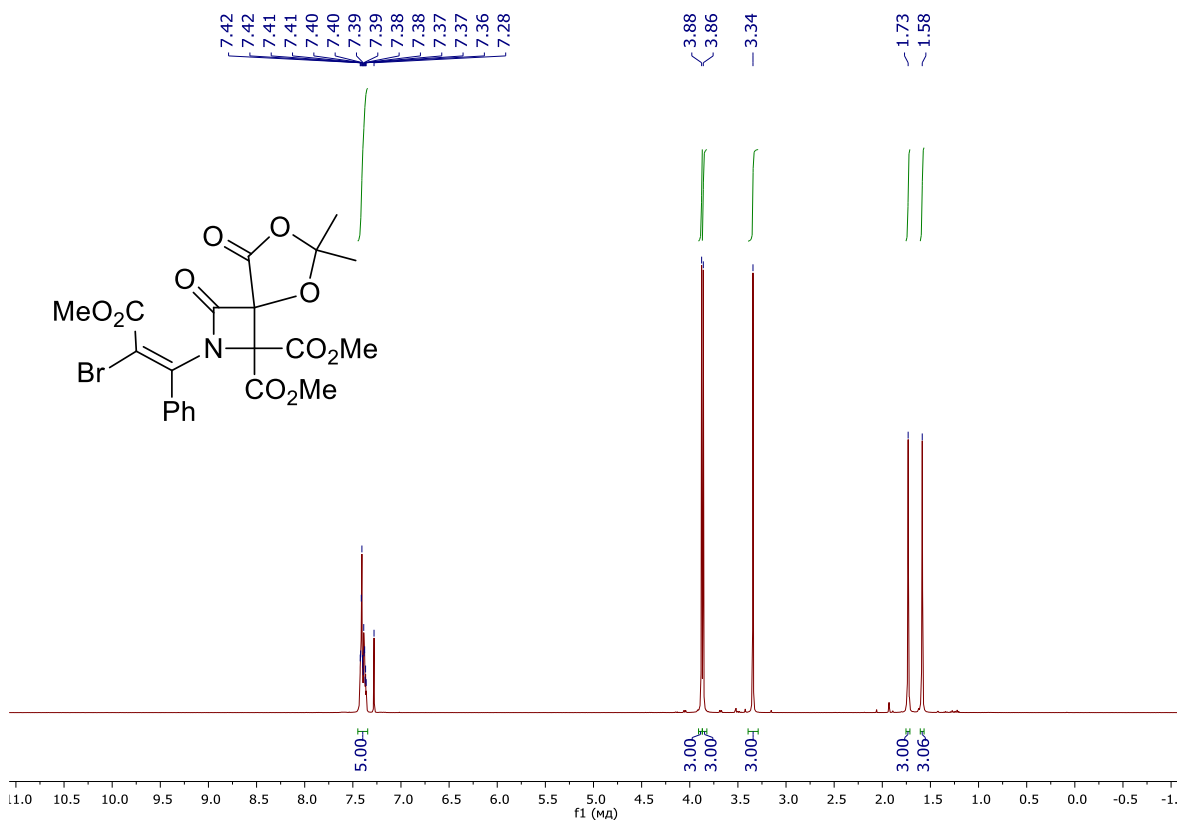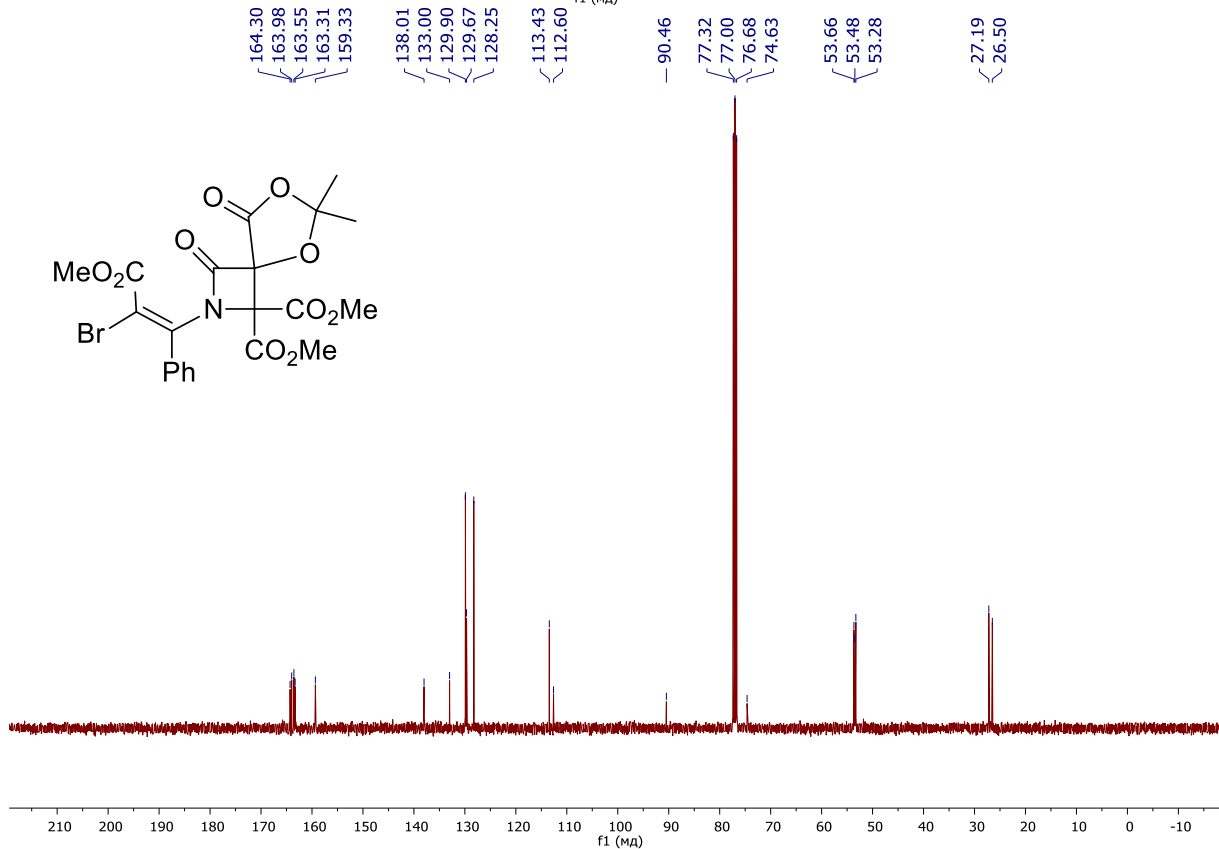



**Dimethyl (E)-2-(2-bromo-3-methoxy-3-oxo-1-(p-tolyl)prop-1-en-1-yl)-6,6-dimethyl-3,8-dioxo-5,7-dioxa-2-azaspiro[3.4]octane-1,1-dicarboxylate (5k)**

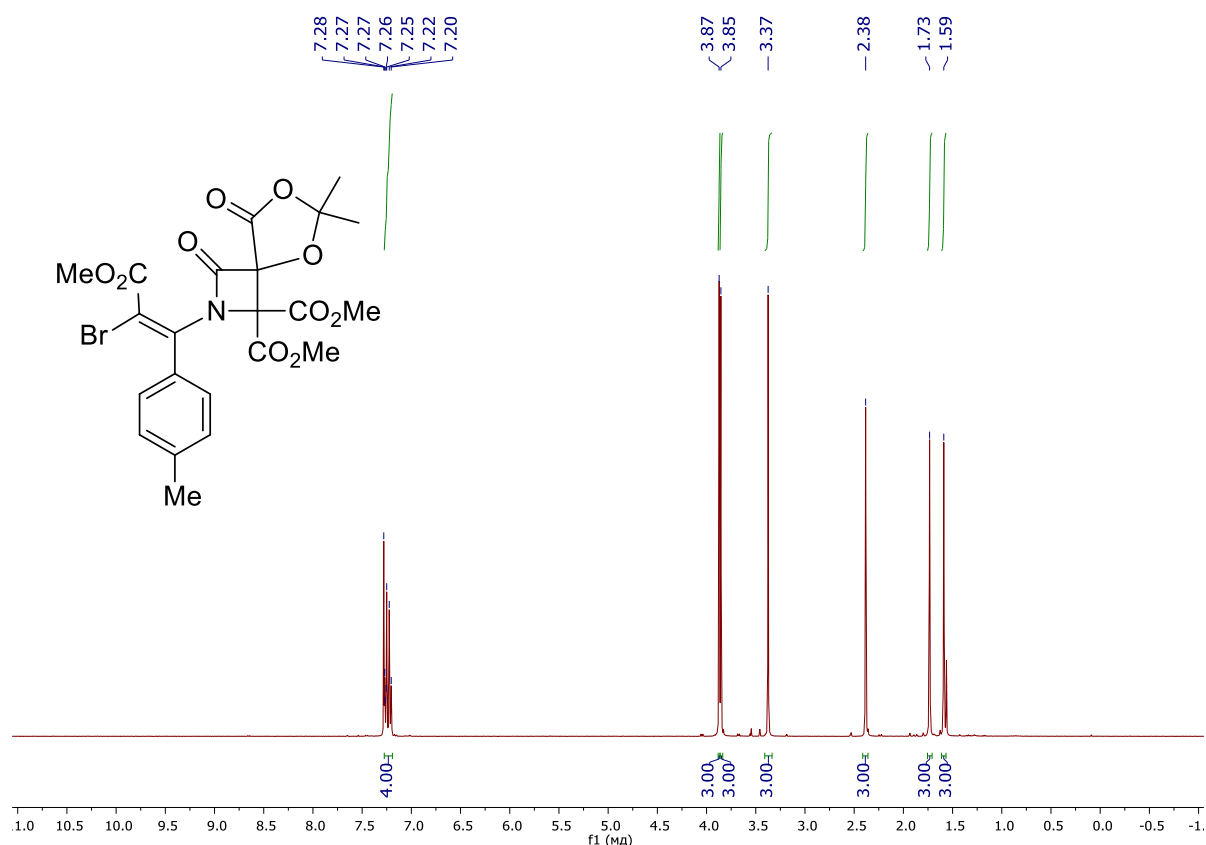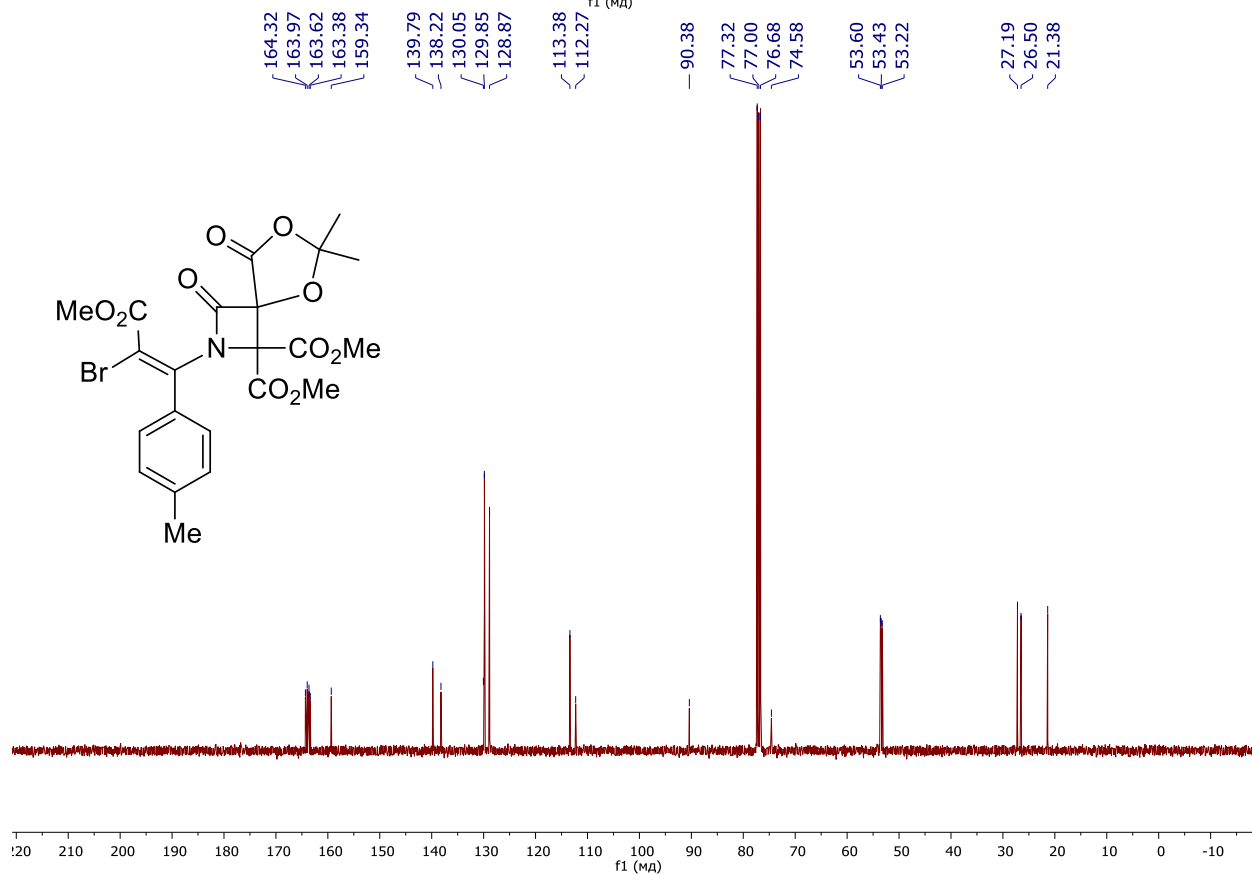

Dimethyl (E)-2-(2-bromo-1-(4-(tert-butyl)phenyl)-3-methoxy-3-oxoprop-1-en-1-yl)-6,6-dimethyl-3,8-dioxo-5,7-dioxa-2-azaspiro[3.4]octane-1,1-dicarboxylate (51)

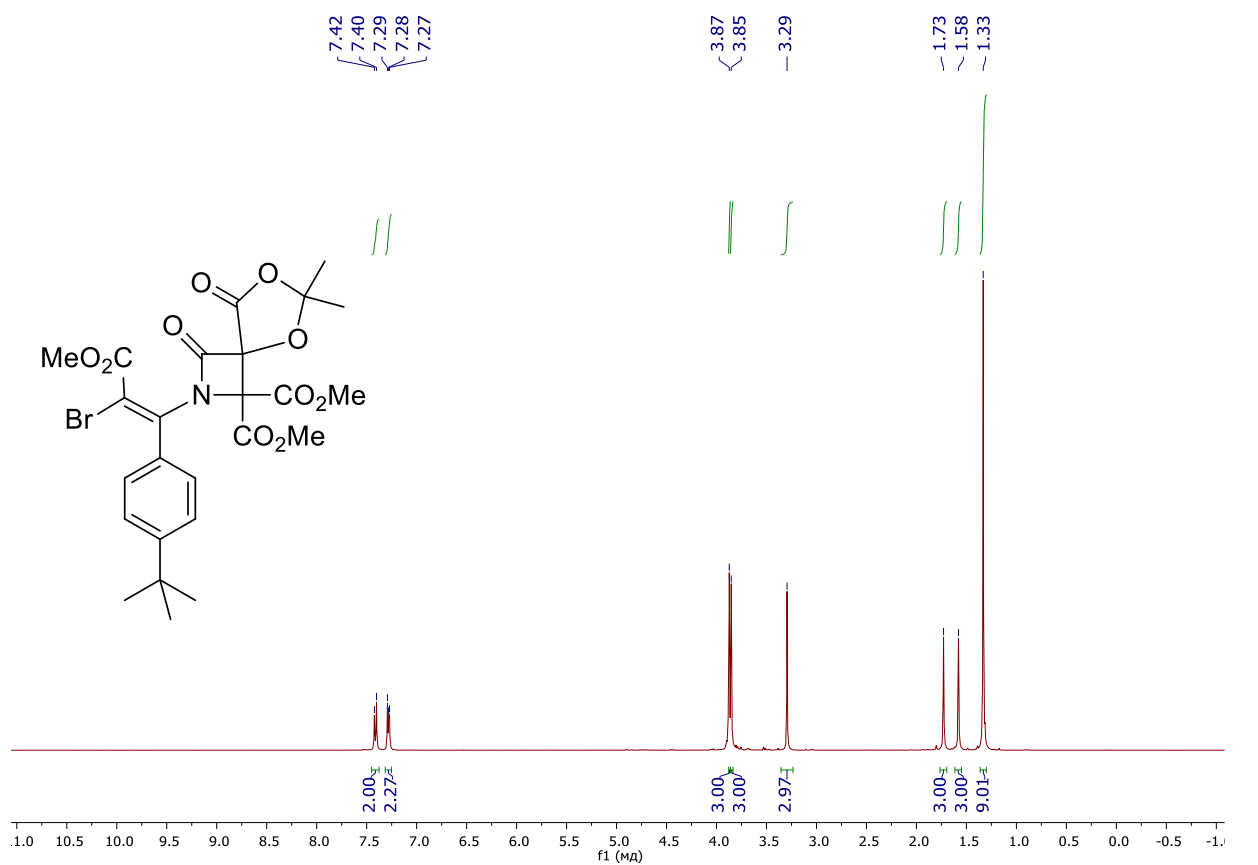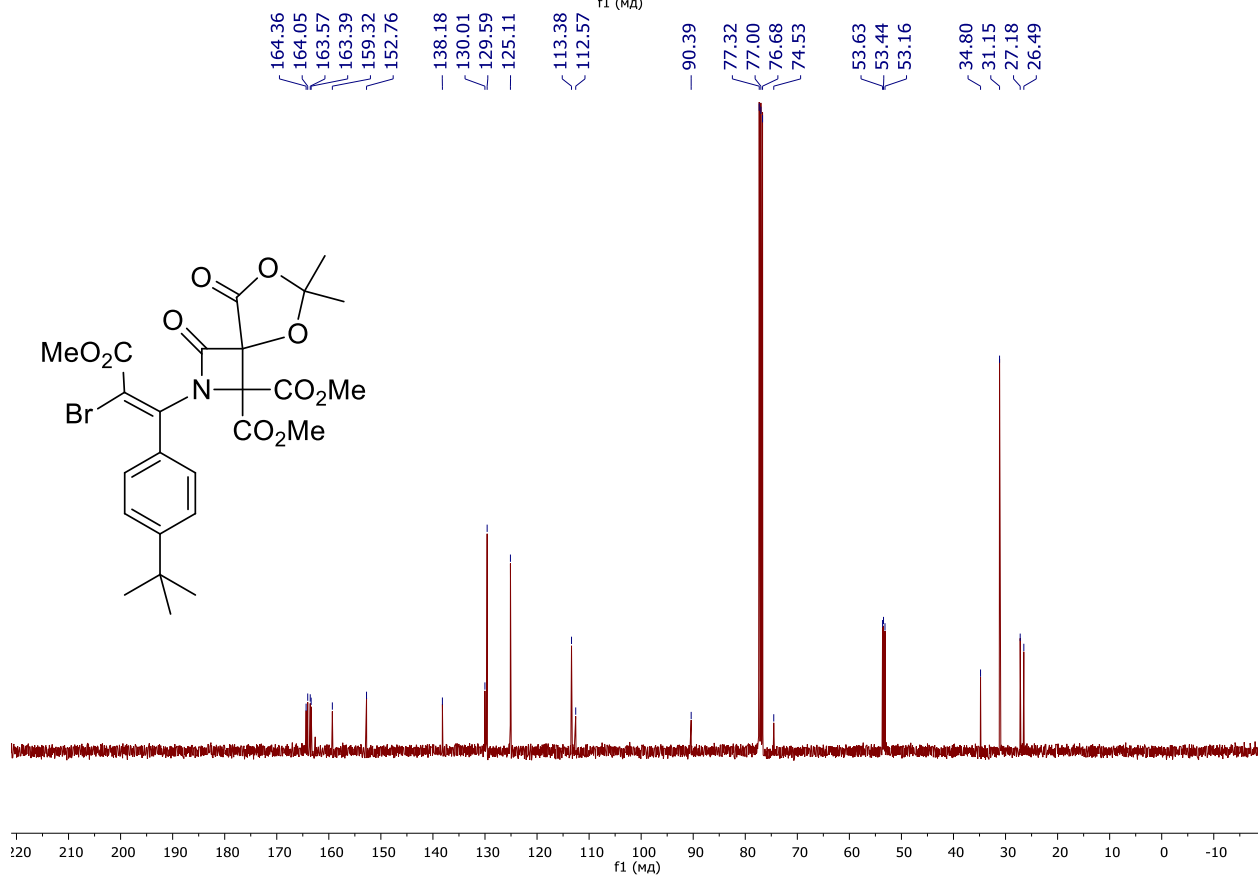

**Dimethyl (*E*)-2-(2-bromo-3-methoxy-1-(4-nitrophenyl)-3-oxoprop-1-en-1-yl)-6,6-dimethyl-3,8-dioxo-5,7-dioxa-2-azaspiro[3.4]octane-1,1-dicarboxylate (5m)**

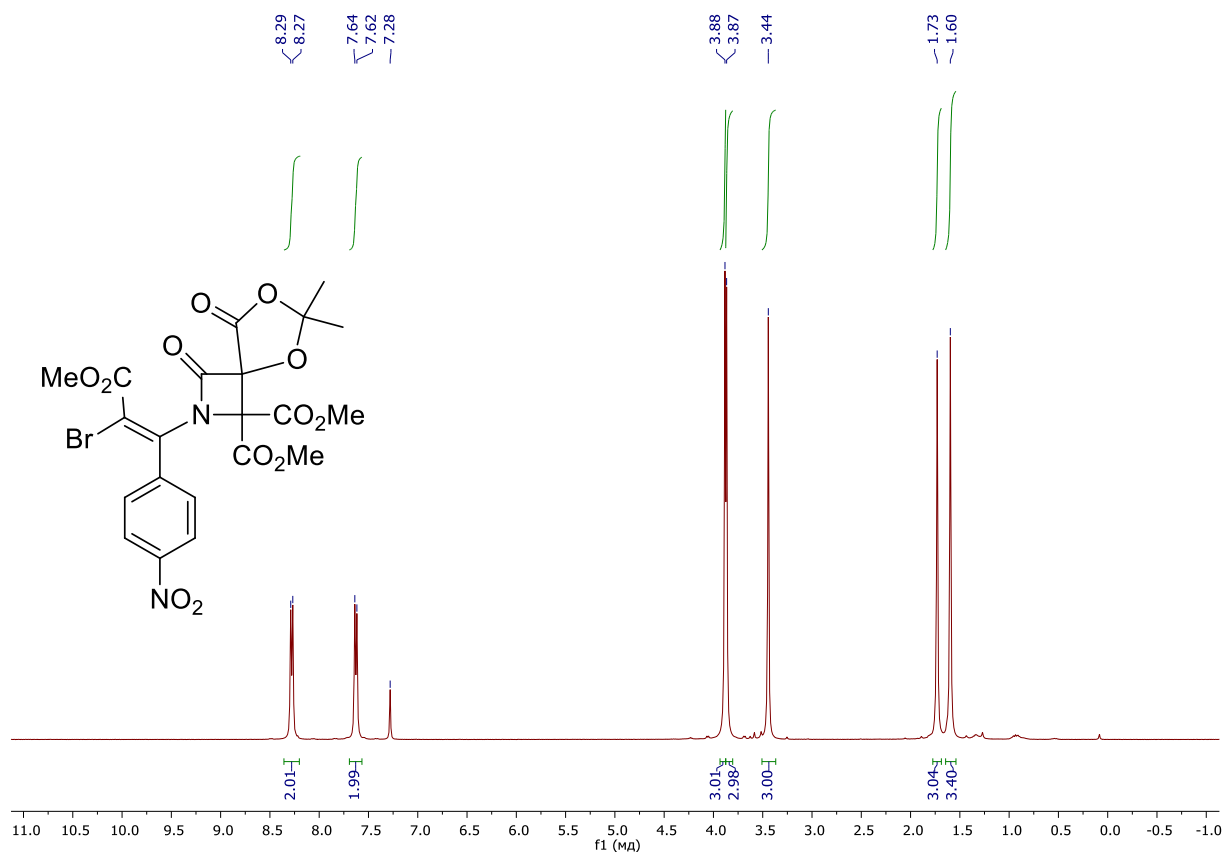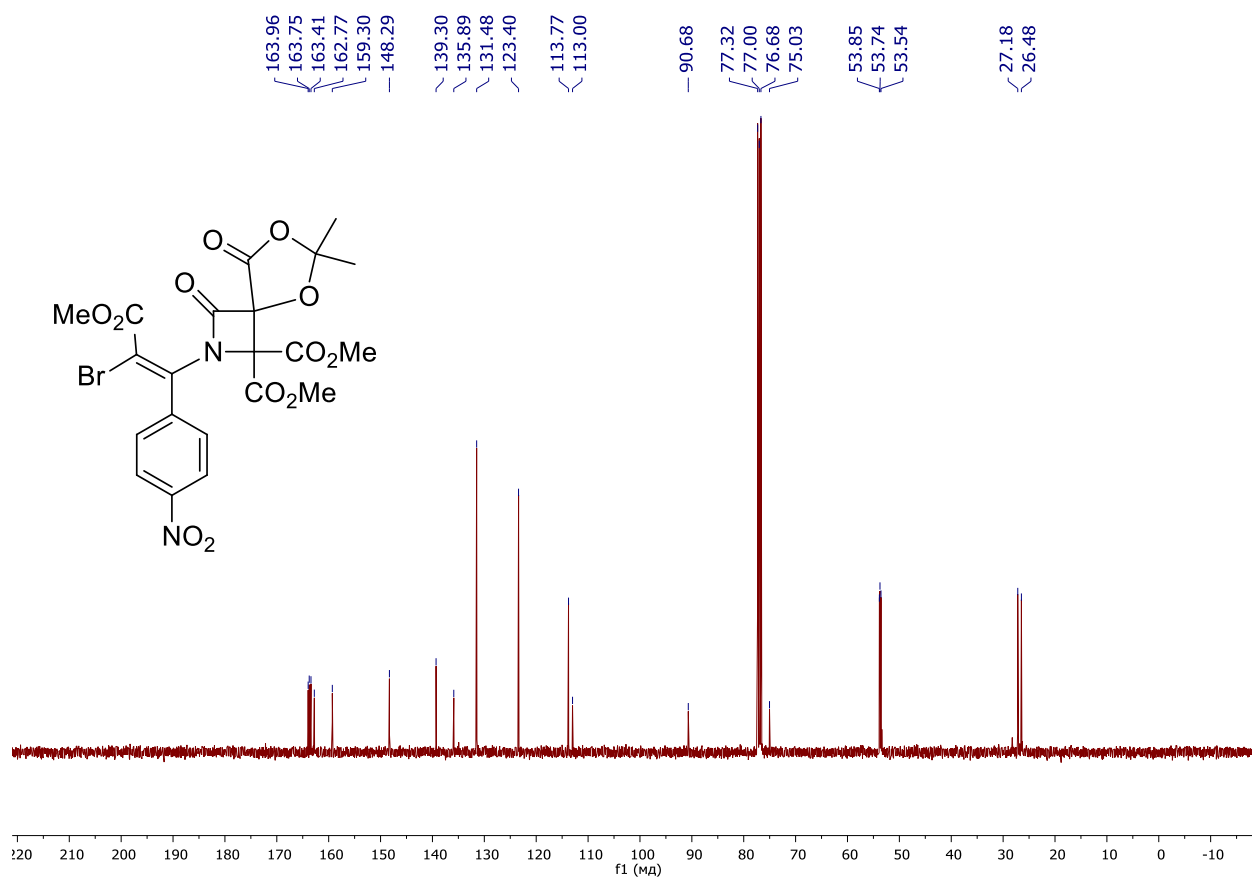

**Diethyl (E)-2-(2-bromo-3-methoxy-3-oxo-1-phenylprop-1-en-1-yl)-6,6-dimethyl-3,8-dioxo-5,7-dioxa-2-azaspiro[3.4]octane-1,1-dicarboxylate (5n)**

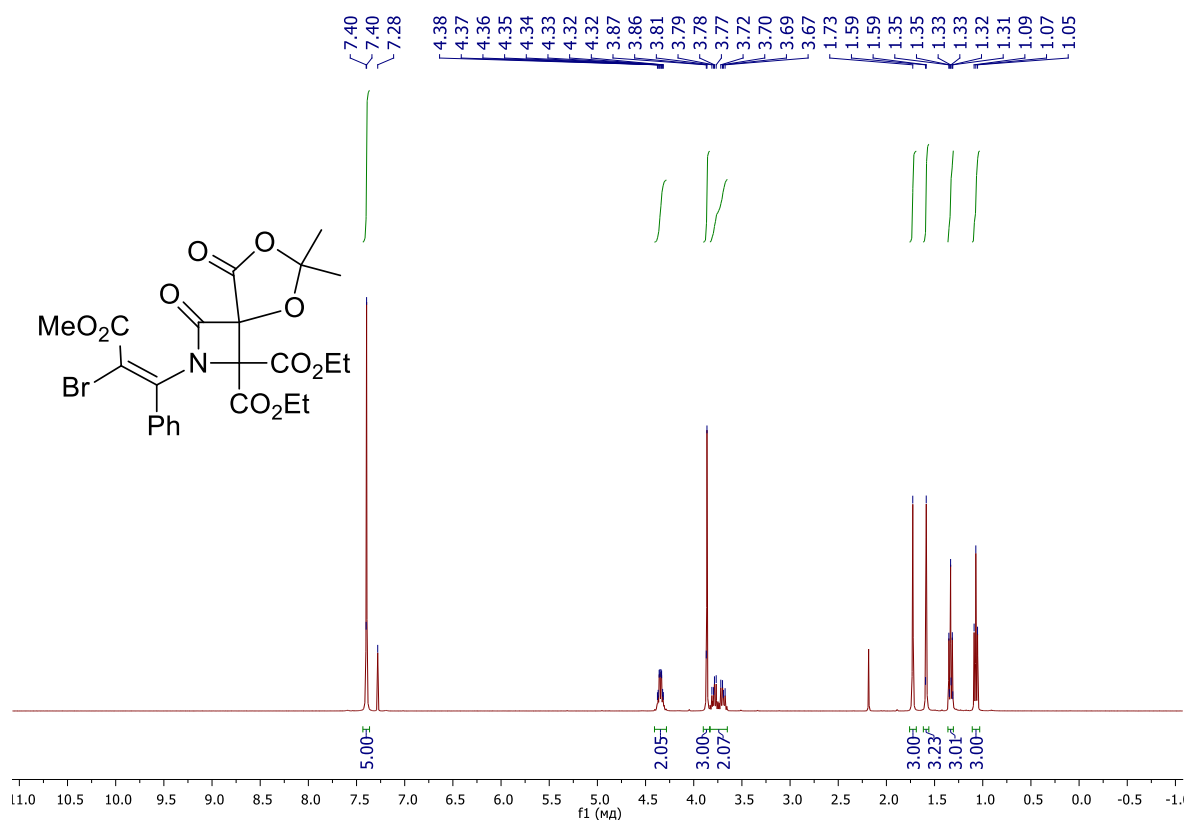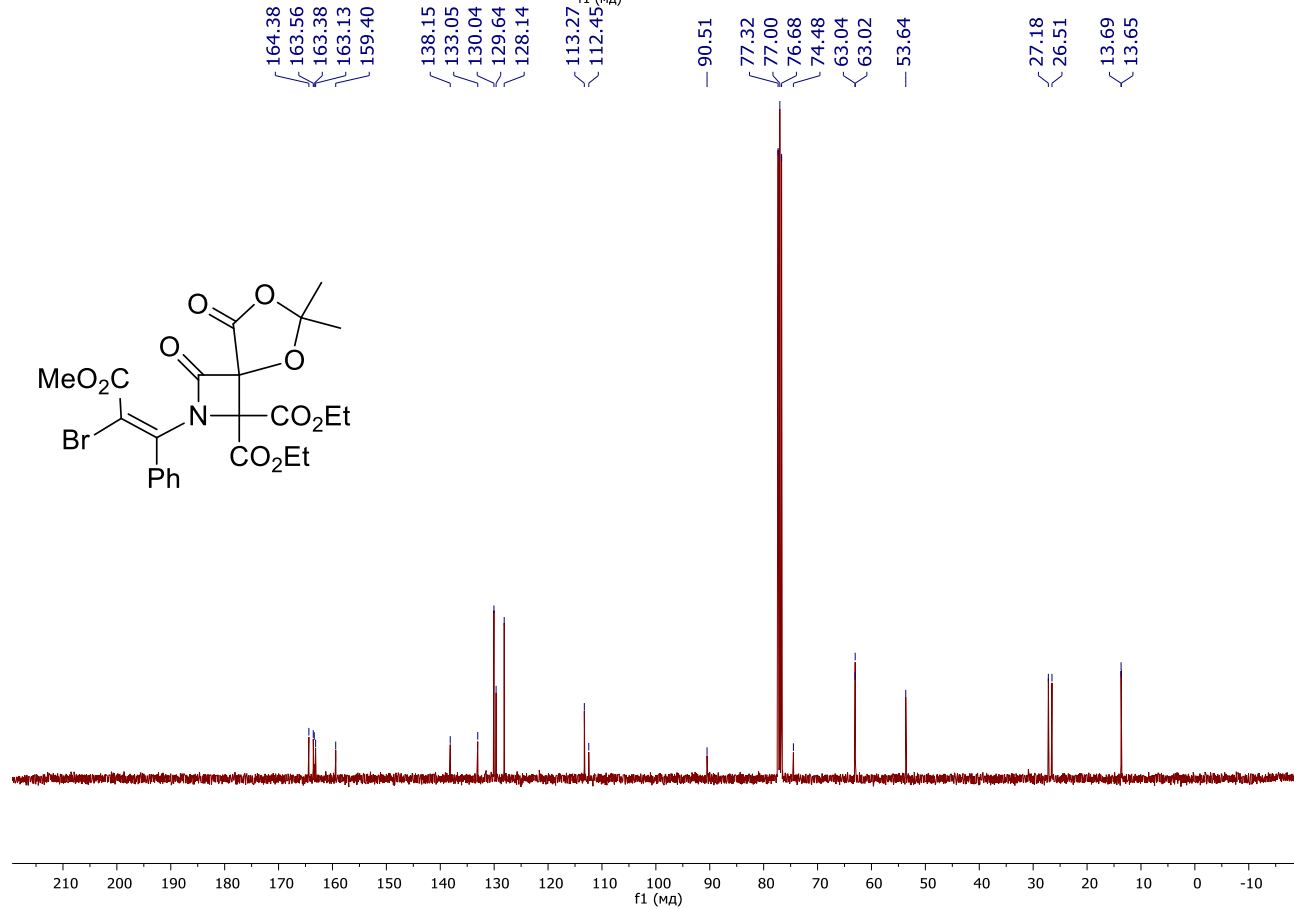

**Dimethyl (*E*)-2-(2-chloro-3-methoxy-3-oxo-1-phenylprop-1-en-1-yl)-6,6-dimethyl-3,8-dioxo-5,7-dioxa-2-azaspiro[3.4]octane-1,1-dicarboxylate (50)**

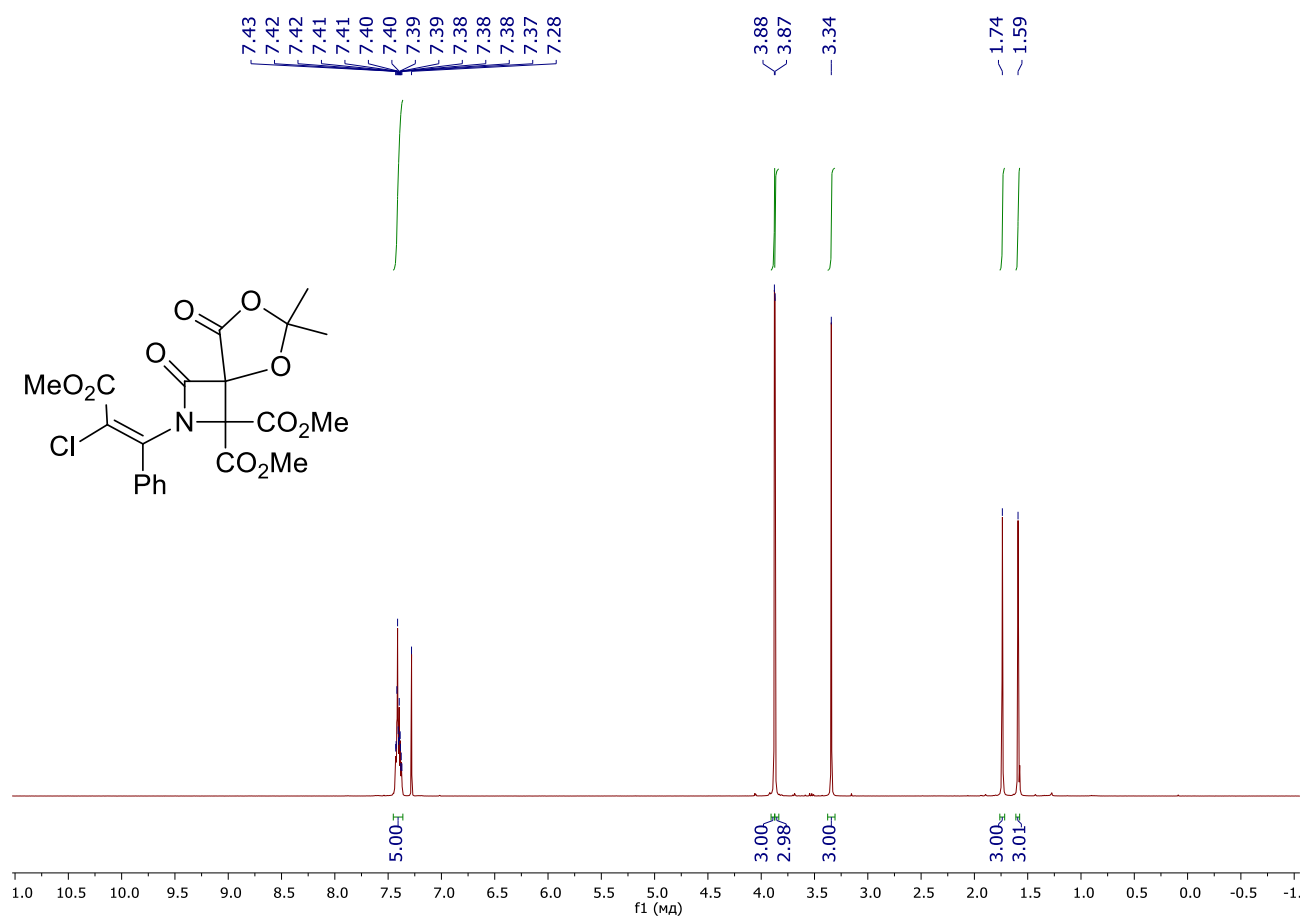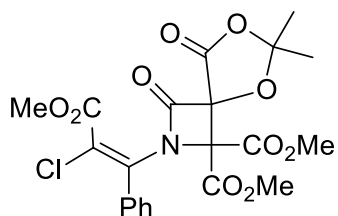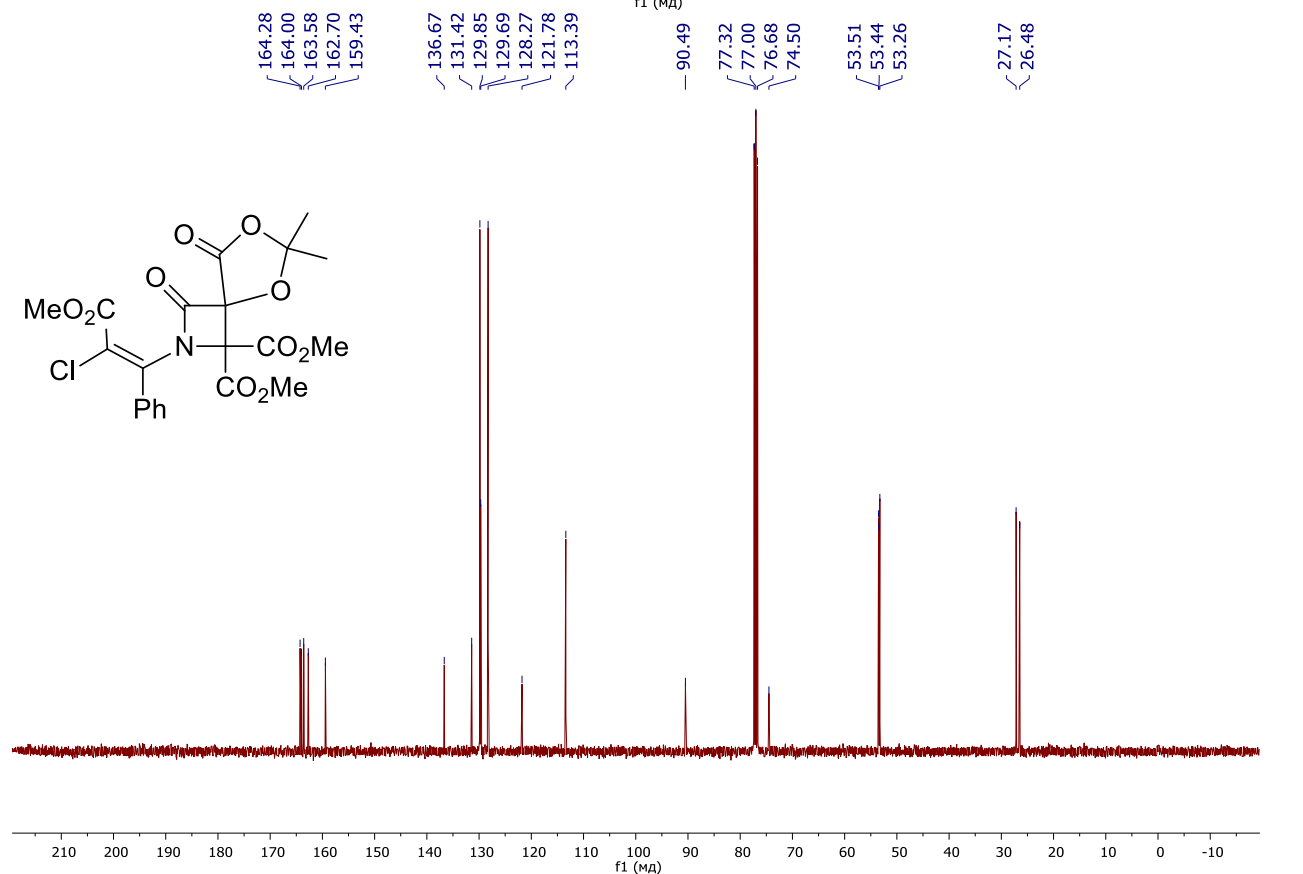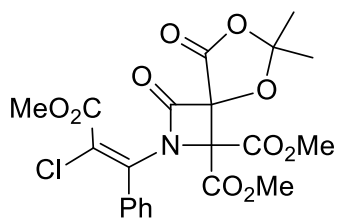

**Methyl (*E*)-1-benzoyl-2-(2-bromo-3-methoxy-3-oxo-1-phenylprop-1-en-1-yl)-6,6-dimethyl-3,8-dioxo-5,7-dioxia-2-azaspiro[3.4]octane-1-carboxylate ((1*R*S,4*R*S)-5p)**

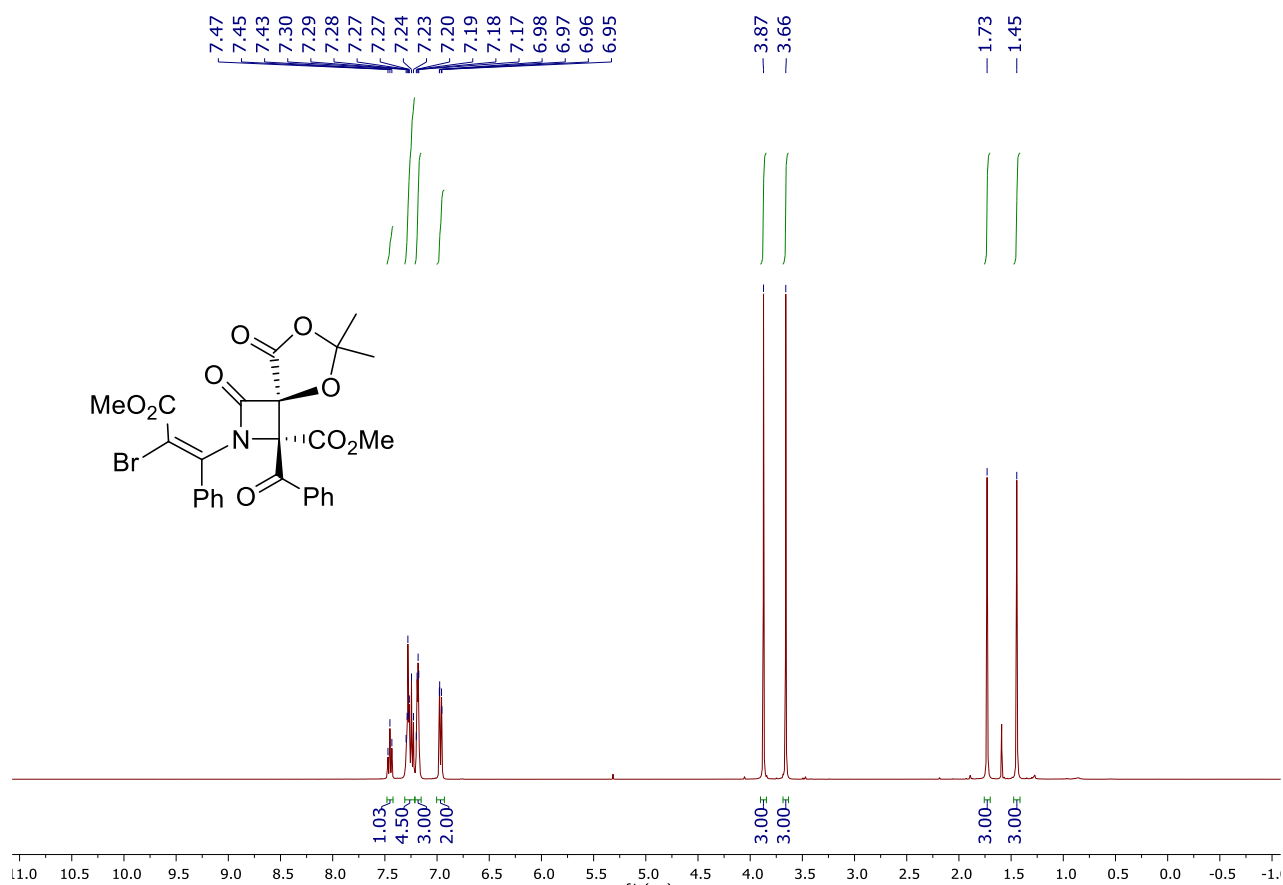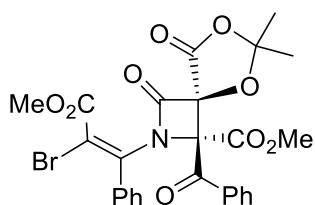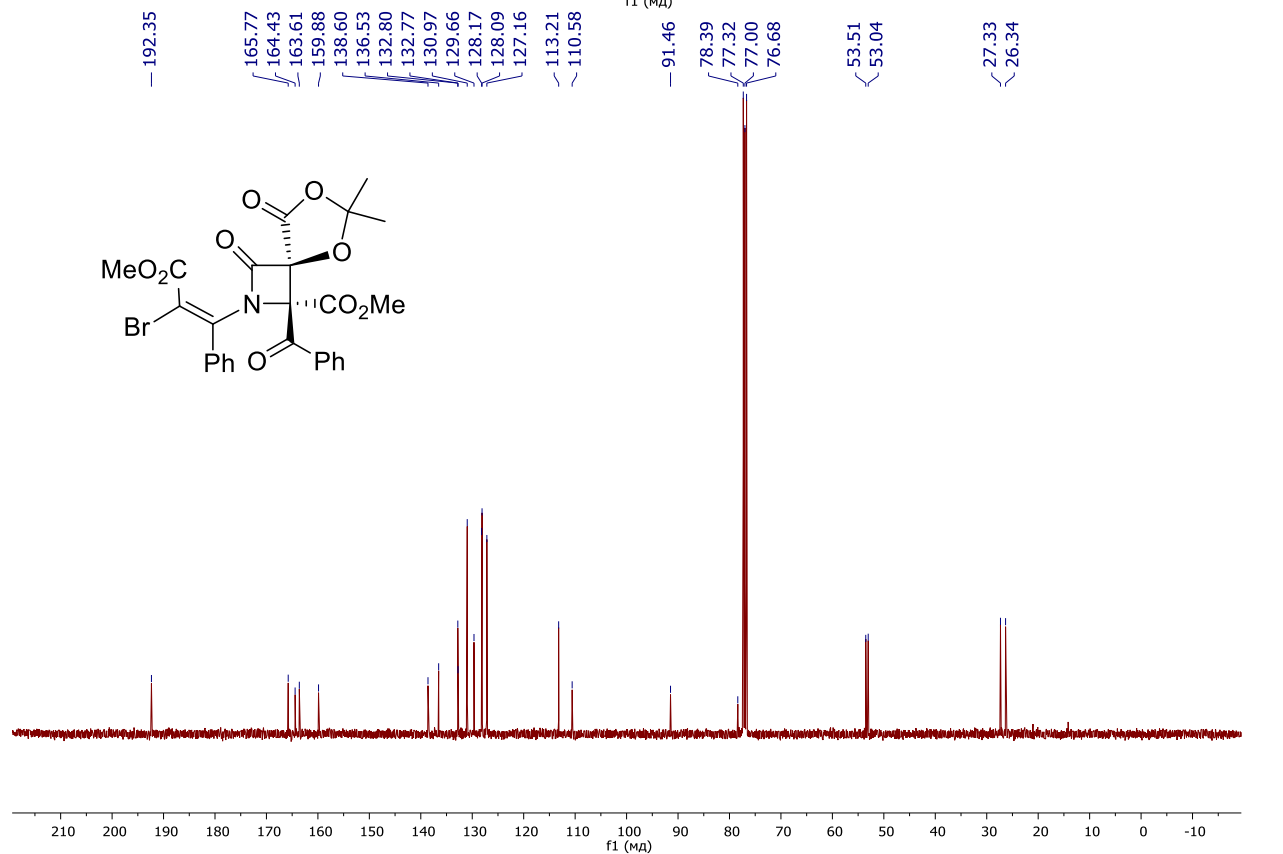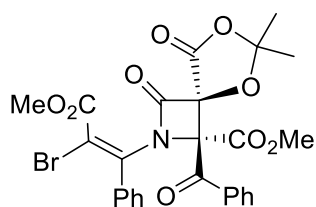

**(1*RS*,4*SR*)-5*p*/(1*RS*,4*RS*)-5*p* mixture (10:1)**

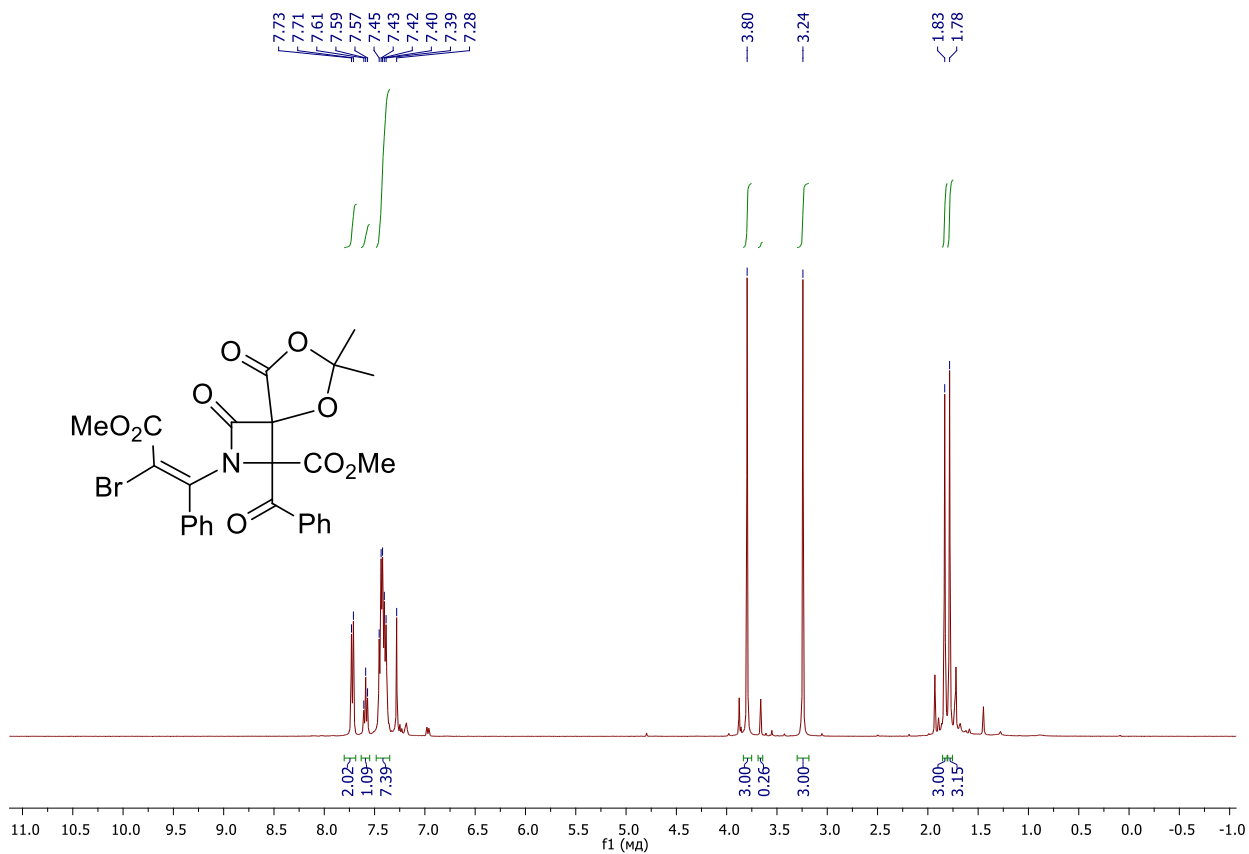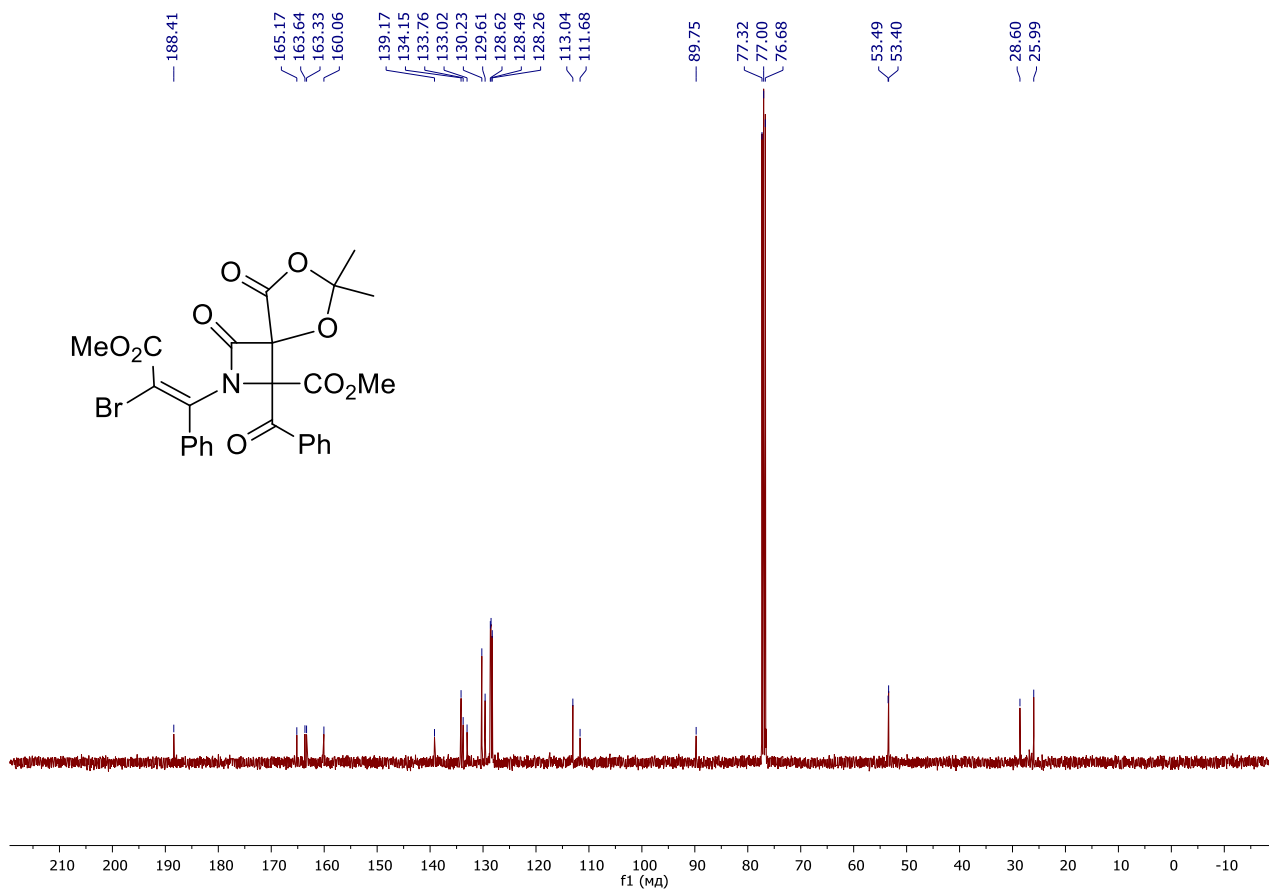

**(E)-methyl 2-(2-bromo-3-methoxy-3-oxo-1-phenylprop-1-en-1-yl)-6,6-dimethyl-1-(4-nitrobenzoyl)-3,8-dioxo-5,7-dioxo-2-azaspiro[3.4]octane-1-carboxylate (5q)**

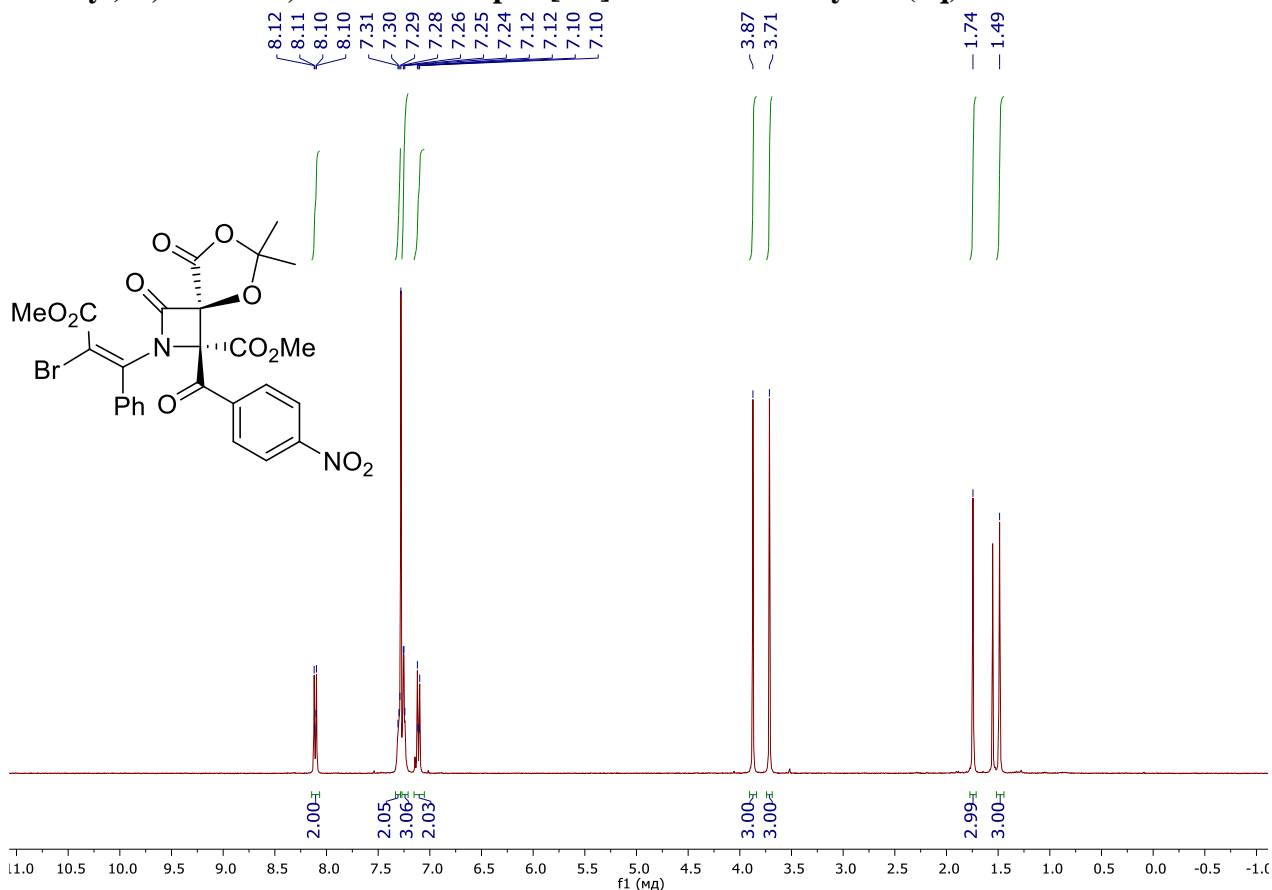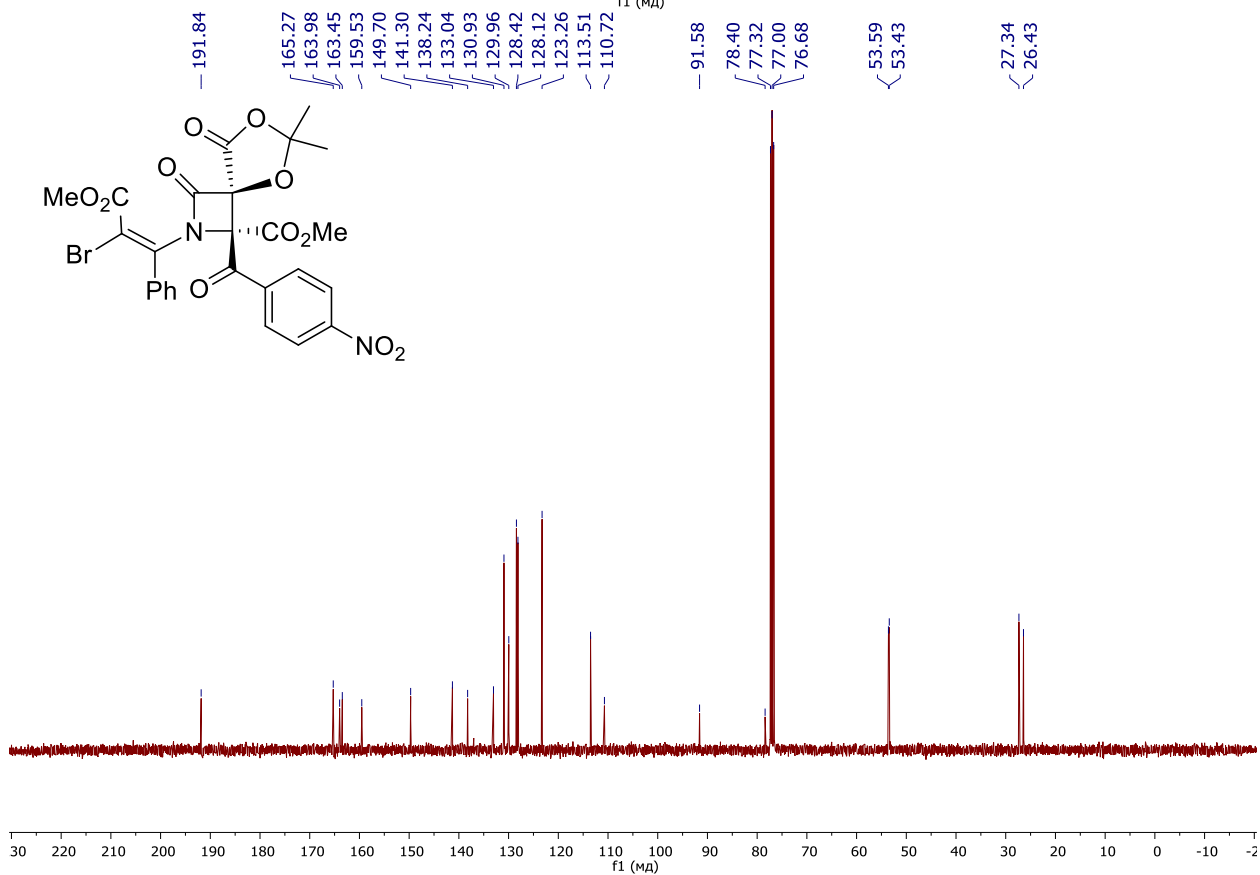



**Methyl (E)-2-(2-bromo-3-methoxy-3-oxo-1-phenylprop-1-en-1-yl)-1-(cyclopropanecarbonyl)-6,6-dimethyl-3,8-dioxo-5,7-dioxa-2-azaspiro[3.4]octane-1-carboxylate ((1*R*,4*R*)-5*r*)**

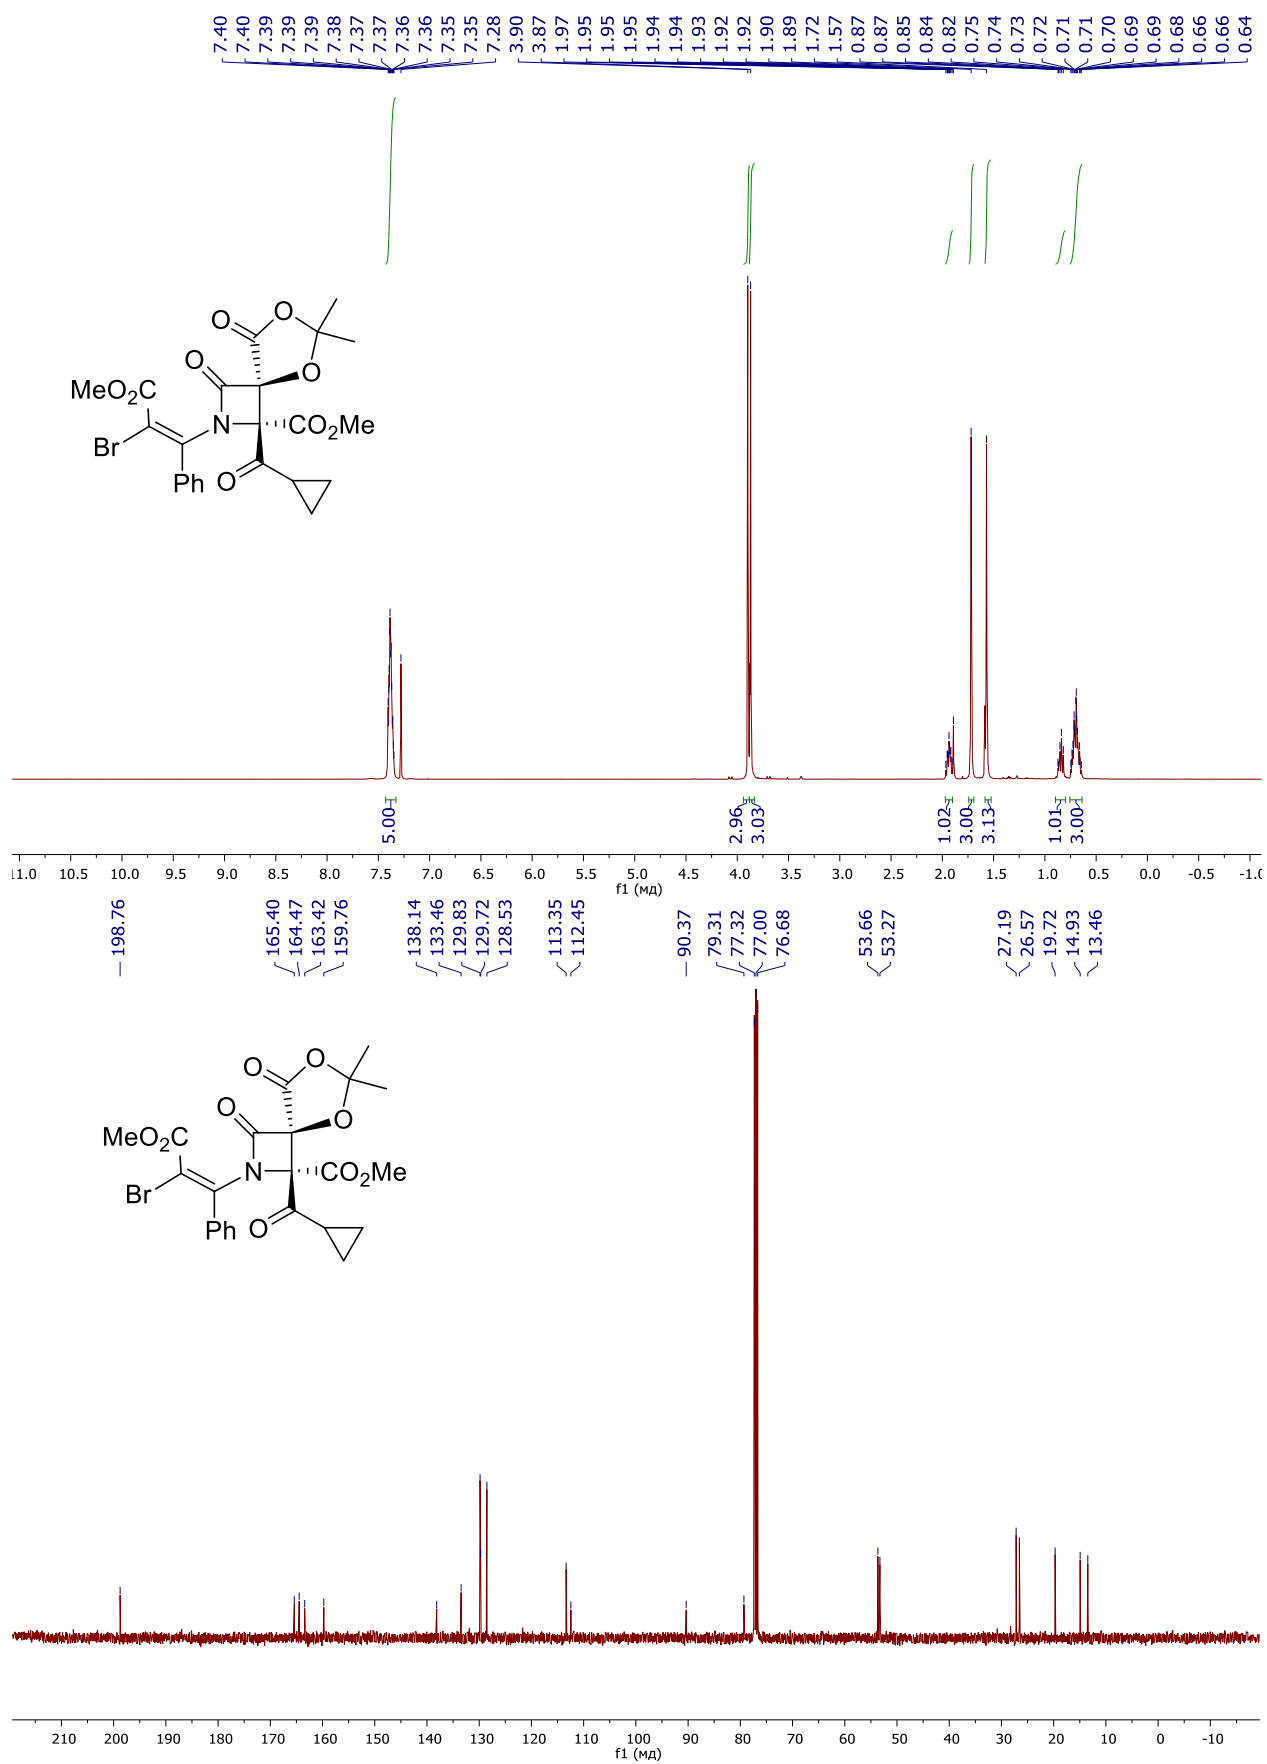

(1*RS*,4*SR*)-5*r*/(1*RS*,4*RS*)-5*r* mixture (6:1)

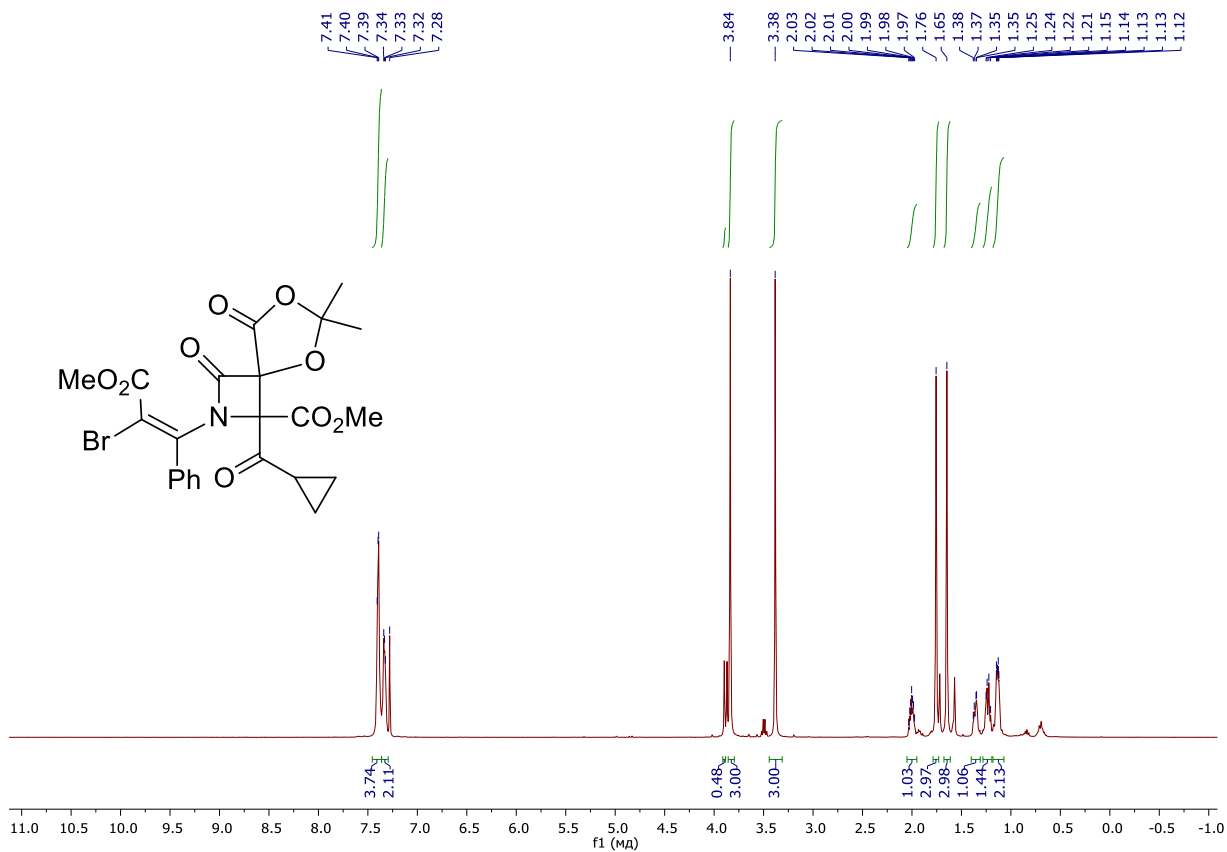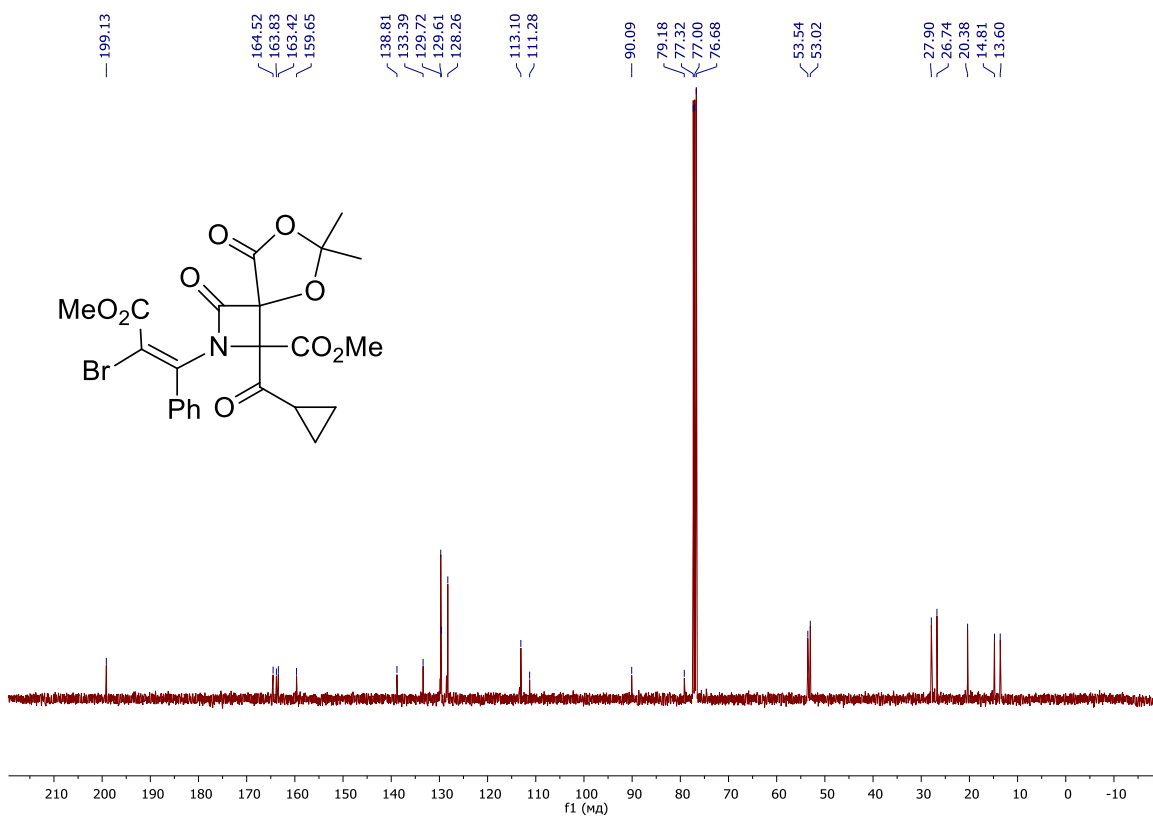

### 4-Bromo-3-(4-(*tert*-butyl)phenyl)-5-methoxyisoxazole (6f)

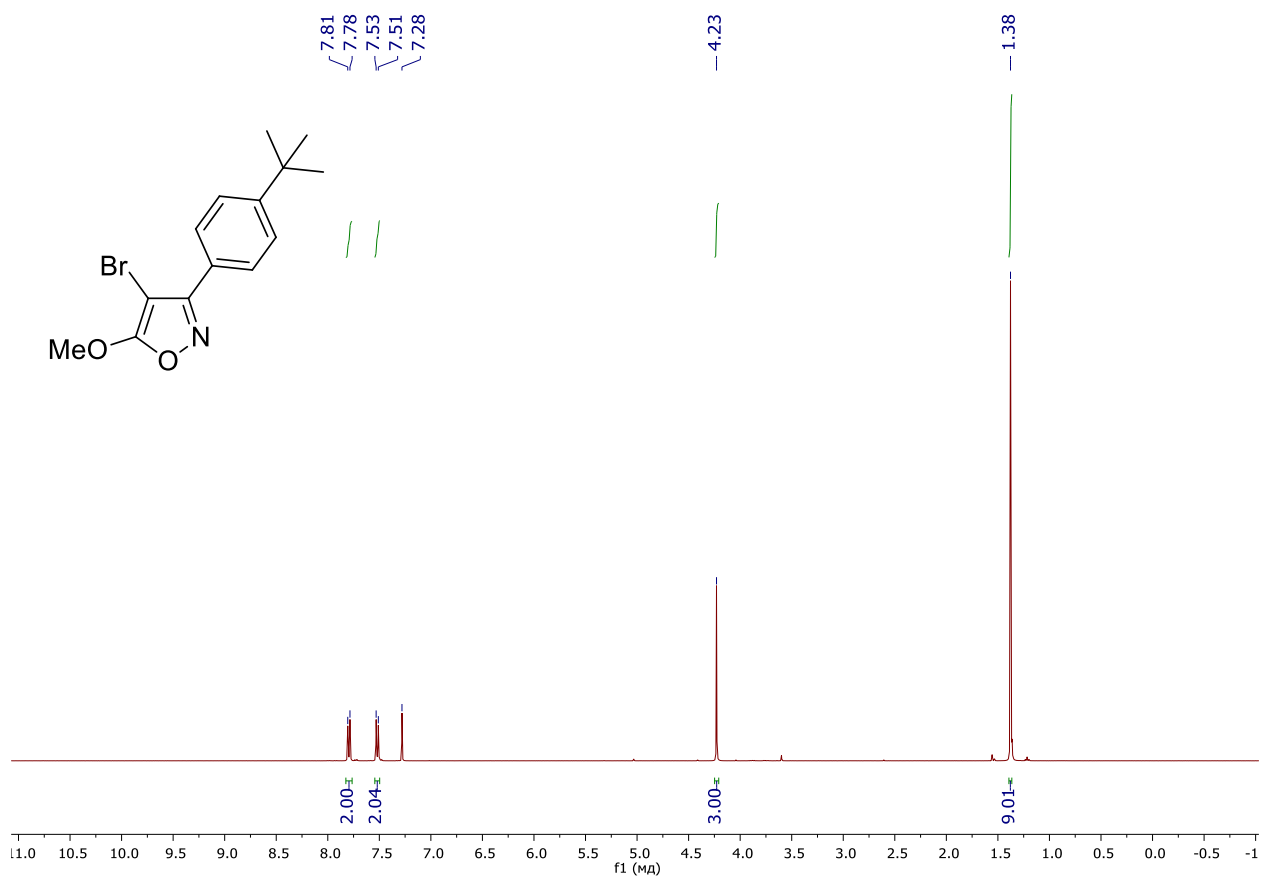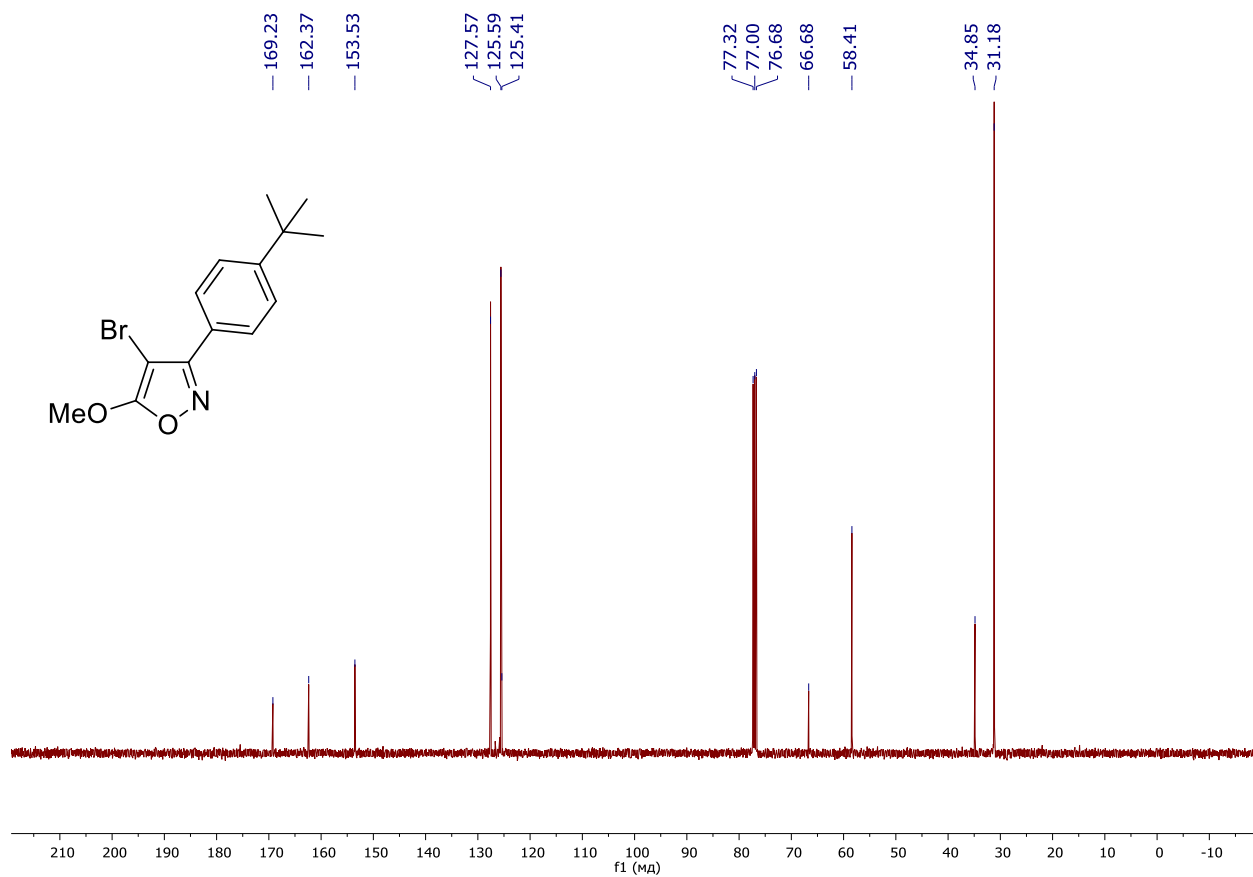

**Methyl (Z)-2-(pyridin-2-yl)-3-phenyl-3-(2,2,9,9-tetramethyl-4,7,11,13-tetraoxo-1,3,8,10-tetraoxa-12-azadispiro[4.0.5<sup>6</sup>.2<sup>5</sup>]<sup>6</sup>tridecan-12-yl)acrylate (12)**

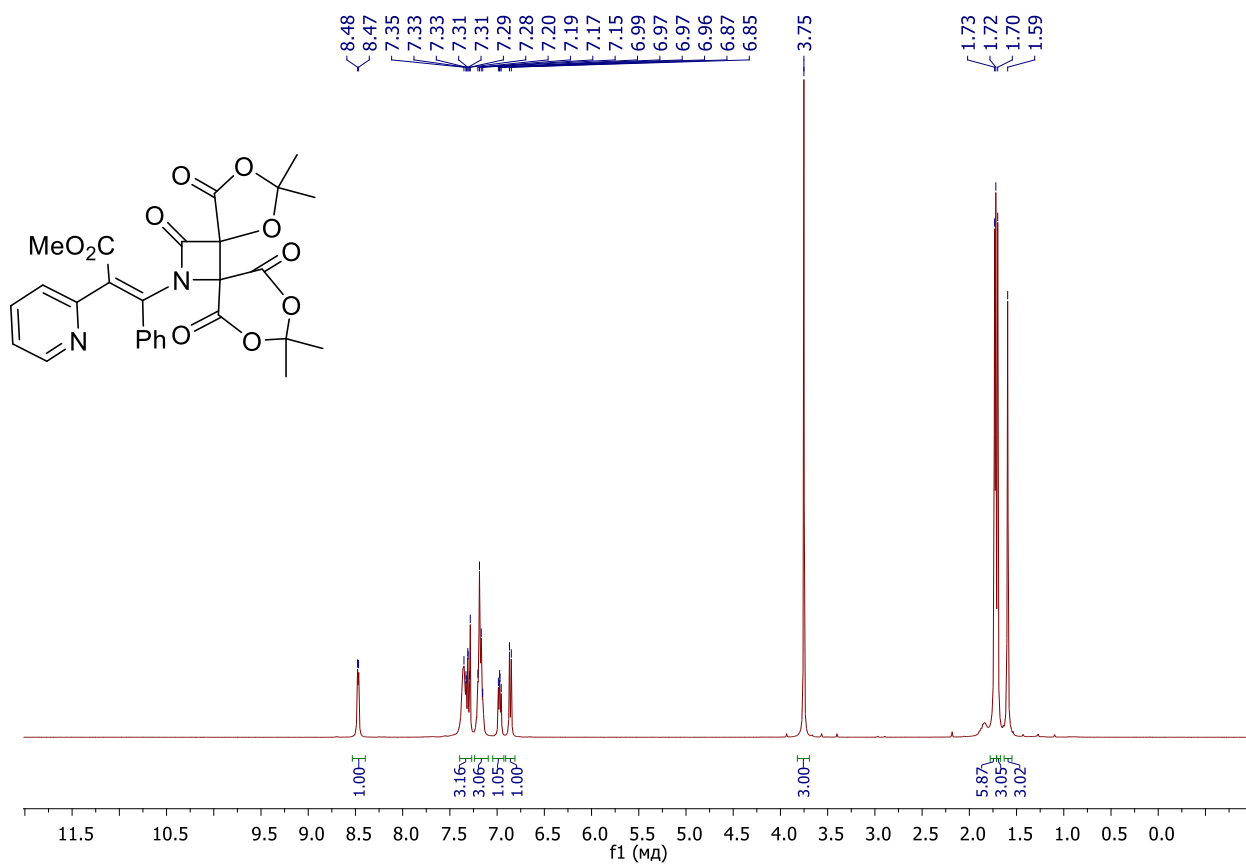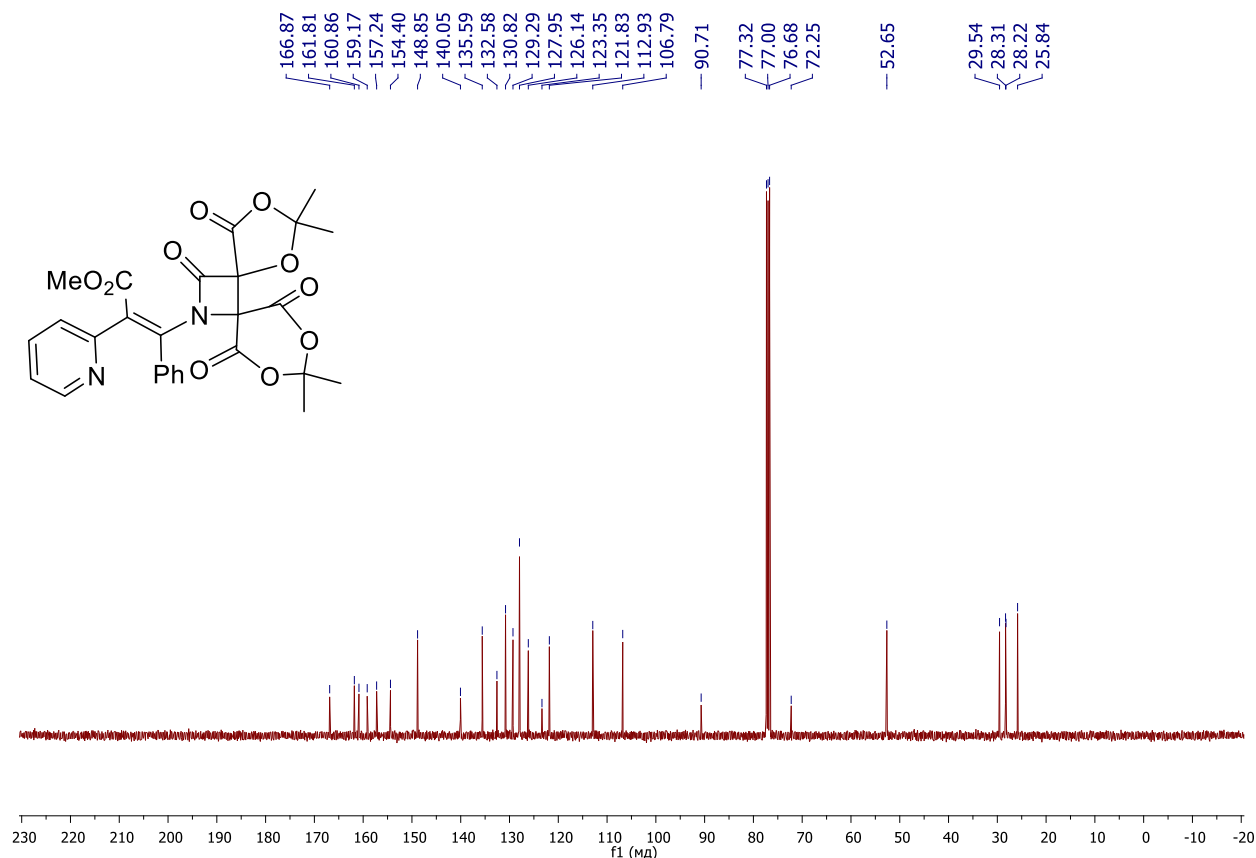

#### 4. X-ray data of compounds 5a,p-r

**Figure S1.** X-Ray crystal structure of lactam **5a** with 50% ellipsoid probability (CCDC 1890947).

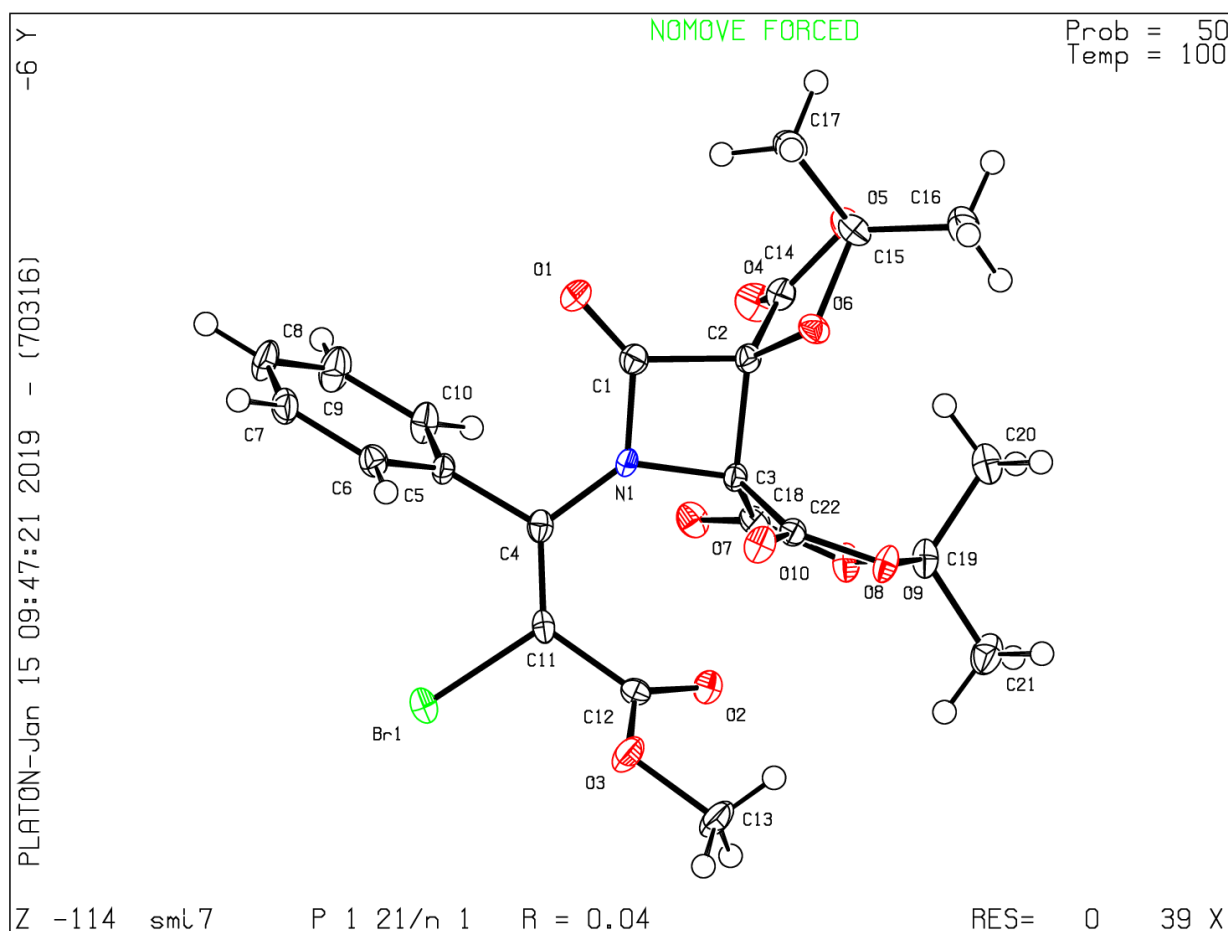

**Table S1.** Crystal data and structure refinement for compound **5a**.

|                                             |                                                               |
|---------------------------------------------|---------------------------------------------------------------|
| Identification code                         | smi7                                                          |
| Empirical formula                           | C <sub>22</sub> H <sub>20</sub> NO <sub>10</sub> Br           |
| Formula weight                              | 538.30                                                        |
| Temperature/K                               | 100(2)                                                        |
| Crystal system                              | monoclinic                                                    |
| Space group                                 | P2 <sub>1</sub> /n                                            |
| a/Å                                         | 9.6963(3)                                                     |
| b/Å                                         | 12.8666(3)                                                    |
| c/Å                                         | 18.3433(6)                                                    |
| α/°                                         | 90                                                            |
| β/°                                         | 100.842(3)                                                    |
| γ/°                                         | 90                                                            |
| Volume/Å <sup>3</sup>                       | 2247.61(12)                                                   |
| Z                                           | 4                                                             |
| ρ <sub>calc</sub> /cm <sup>3</sup>          | 1.591                                                         |
| μ/mm <sup>-1</sup>                          | 1.888                                                         |
| F(000)                                      | 1096.0                                                        |
| Crystal size/mm <sup>3</sup>                | 0.26 × 0.20 × 0.16                                            |
| Radiation                                   | MoKα (λ = 0.71073)                                            |
| 2θ range for data collection/°              | 5.2 to 54.988                                                 |
| Index ranges                                | -11 ≤ h ≤ 12, -16 ≤ k ≤ 16, -23 ≤ l ≤ 23                      |
| Reflections collected                       | 22363                                                         |
| Independent reflections                     | 5104 [R <sub>int</sub> = 0.0392, R <sub>sigma</sub> = 0.0386] |
| Data/restraints/parameters                  | 5104/0/312                                                    |
| Goodness-of-fit on F <sup>2</sup>           | 1.047                                                         |
| Final R indexes [I ≥ 2σ (I)]                | R <sub>1</sub> = 0.0380, wR <sub>2</sub> = 0.0743             |
| Final R indexes [all data]                  | R <sub>1</sub> = 0.0509, wR <sub>2</sub> = 0.0790             |
| Largest diff. peak/hole / e Å <sup>-3</sup> | 1.19/-0.55                                                    |

**Figure S2.** X-Ray crystal structure of lactam **5p** with 50% ellipsoid probability (CCDC 1811691).

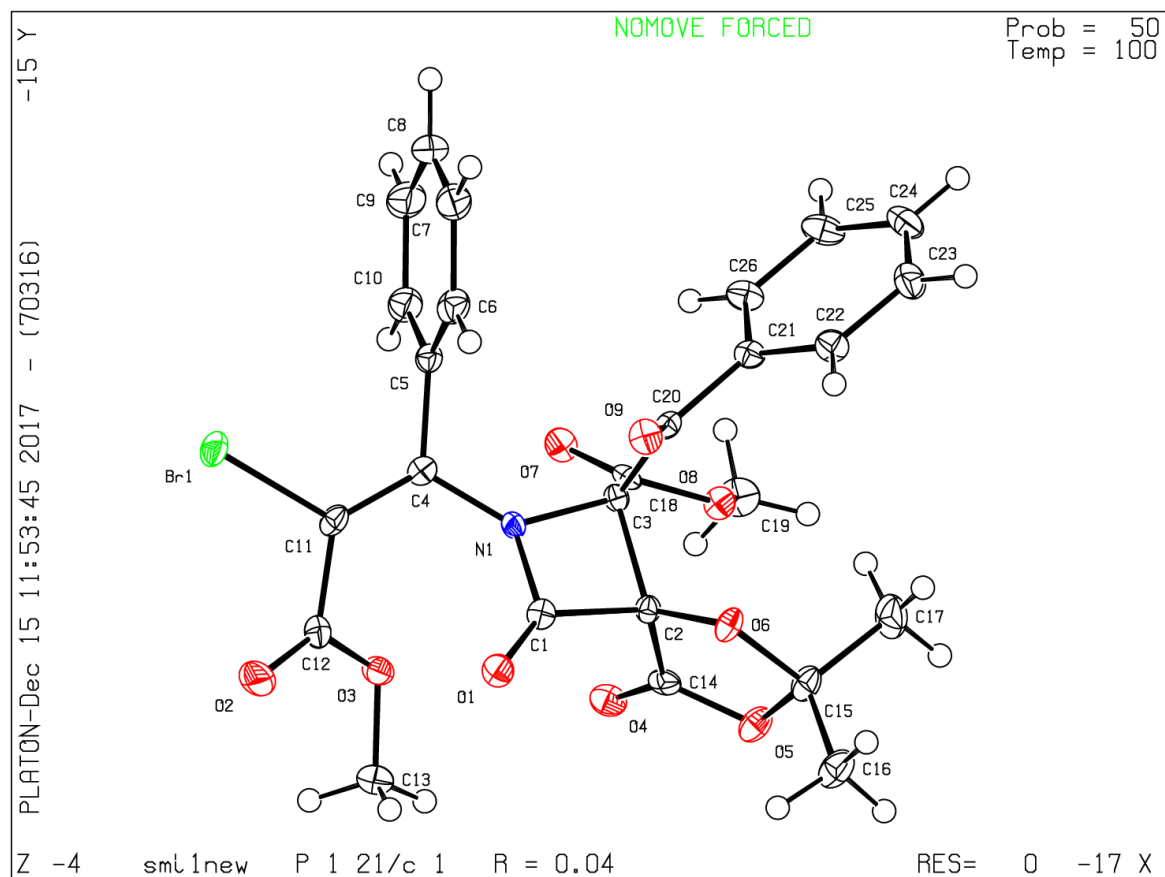

**Table S2.** Crystal data and structure refinement for compound **5p**.

|                                             |                                                               |
|---------------------------------------------|---------------------------------------------------------------|
| Identification code                         | smi1new                                                       |
| Empirical formula                           | C <sub>26</sub> H <sub>22</sub> NO <sub>9</sub> Br            |
| Formula weight                              | 572.35                                                        |
| Temperature/K                               | 100(2)                                                        |
| Crystal system                              | monoclinic                                                    |
| Space group                                 | P2 <sub>1</sub> /c                                            |
| a/Å                                         | 11.2685(6)                                                    |
| b/Å                                         | 18.6581(7)                                                    |
| c/Å                                         | 12.8795(8)                                                    |
| α/°                                         | 90                                                            |
| β/°                                         | 111.426(7)                                                    |
| γ/°                                         | 90                                                            |
| Volume/Å <sup>3</sup>                       | 2520.8(2)                                                     |
| Z                                           | 4                                                             |
| ρ <sub>calc</sub> /cm <sup>3</sup>          | 1.508                                                         |
| μ/mm <sup>-1</sup>                          | 1.686                                                         |
| F(000)                                      | 1168.0                                                        |
| Crystal size/mm <sup>3</sup>                | 0.28 × 0.16 × 0.12                                            |
| Radiation                                   | MoKα (λ = 0.71073)                                            |
| 2θ range for data collection/°              | 5.532 to 54.996                                               |
| Index ranges                                | -13 ≤ h ≤ 14, -22 ≤ k ≤ 24, -12 ≤ l ≤ 16                      |
| Reflections collected                       | 10736                                                         |
| Independent reflections                     | 5709 [R <sub>int</sub> = 0.0324, R <sub>sigma</sub> = 0.0557] |
| Data/restraints/parameters                  | 5709/0/338                                                    |
| Goodness-of-fit on F <sup>2</sup>           | 1.030                                                         |
| Final R indexes [I ≥ 2σ (I)]                | R <sub>1</sub> = 0.0388, wR <sub>2</sub> = 0.0764             |
| Final R indexes [all data]                  | R <sub>1</sub> = 0.0592, wR <sub>2</sub> = 0.0845             |
| Largest diff. peak/hole / e Å <sup>-3</sup> | 0.66/-0.47                                                    |



**Figure S3.** X-Ray crystal structure of lactam **5q** with 50% ellipsoid probability (CCDC 1893280).

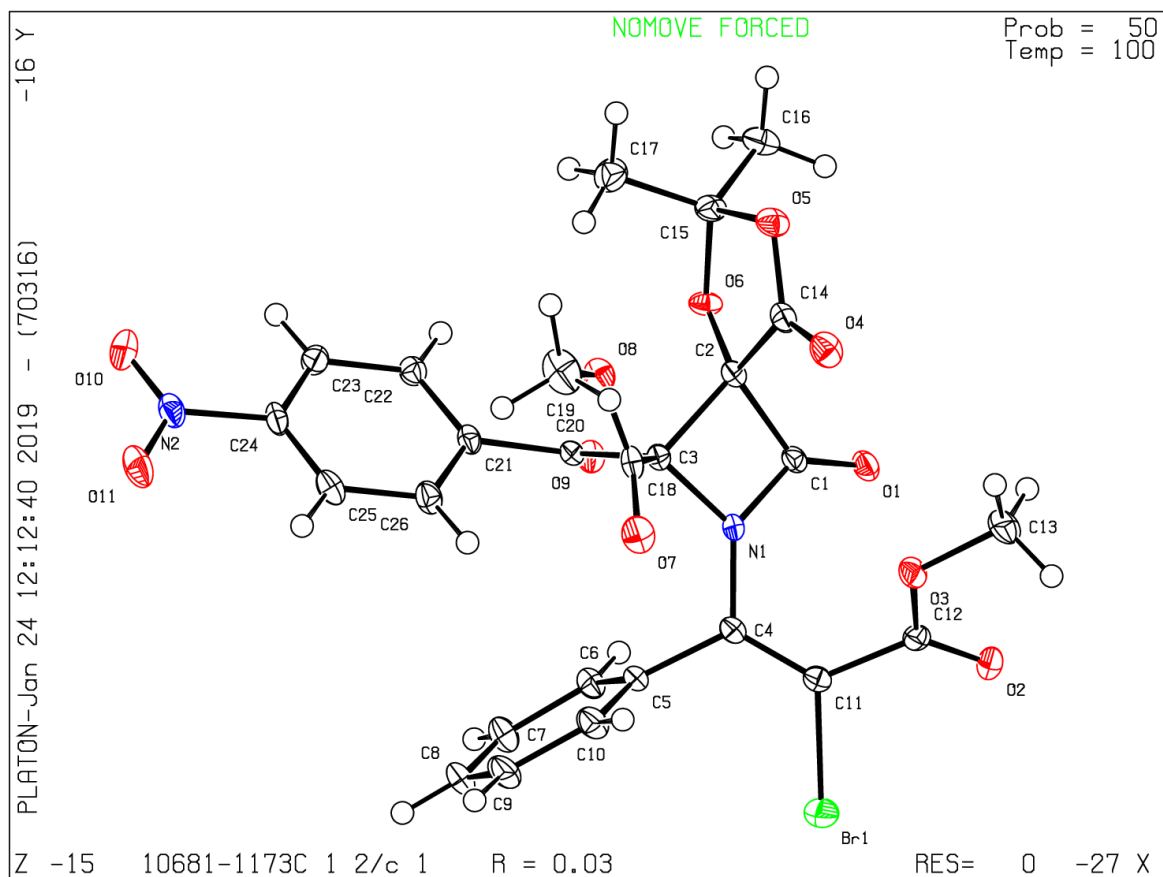

**Table S3.** Crystal data and structure refinement for compound **5q**.

|                                             |                                                                  |
|---------------------------------------------|------------------------------------------------------------------|
| Identification code                         | 10681-11733_agf2                                                 |
| Empirical formula                           | C <sub>26</sub> H <sub>21</sub> BrN <sub>2</sub> O <sub>11</sub> |
| Formula weight                              | 617.36                                                           |
| Temperature/K                               | 100(2)                                                           |
| Crystal system                              | monoclinic                                                       |
| Space group                                 | C2/c                                                             |
| a/Å                                         | 17.9781(2)                                                       |
| b/Å                                         | 10.33117(14)                                                     |
| c/Å                                         | 27.7978(4)                                                       |
| α/°                                         | 90                                                               |
| β/°                                         | 93.5433(12)                                                      |
| γ/°                                         | 90                                                               |
| Volume/Å <sup>3</sup>                       | 5153.15(12)                                                      |
| Z                                           | 8                                                                |
| ρ <sub>calc</sub> /cm <sup>3</sup>          | 1.591                                                            |
| μ/mm <sup>-1</sup>                          | 2.770                                                            |
| F(000)                                      | 2512.0                                                           |
| Crystal size/mm <sup>3</sup>                | 0.26 × 0.16 × 0.12                                               |
| Radiation                                   | CuKα (λ = 1.54184)                                               |
| 2θ range for data collection/°              | 6.372 to 152.302                                                 |
| Index ranges                                | -22 ≤ h ≤ 22, -12 ≤ k ≤ 12, -34 ≤ l ≤ 34                         |
| Reflections collected                       | 34103                                                            |
| Independent reflections                     | 5332 [R <sub>int</sub> = 0.0301, R <sub>sigma</sub> = 0.0181]    |
| Data/restraints/parameters                  | 5332/0/365                                                       |
| Goodness-of-fit on F <sup>2</sup>           | 1.064                                                            |
| Final R indexes [I >= 2σ (I)]               | R <sub>1</sub> = 0.0346, wR <sub>2</sub> = 0.0979                |
| Final R indexes [all data]                  | R <sub>1</sub> = 0.0356, wR <sub>2</sub> = 0.0988                |
| Largest diff. peak/hole / e Å <sup>-3</sup> | 0.50/-0.93                                                       |

**Figure S4.** X-Ray crystal structure of lactam **5r** with 50% ellipsoid probability (CCDC 1893285).

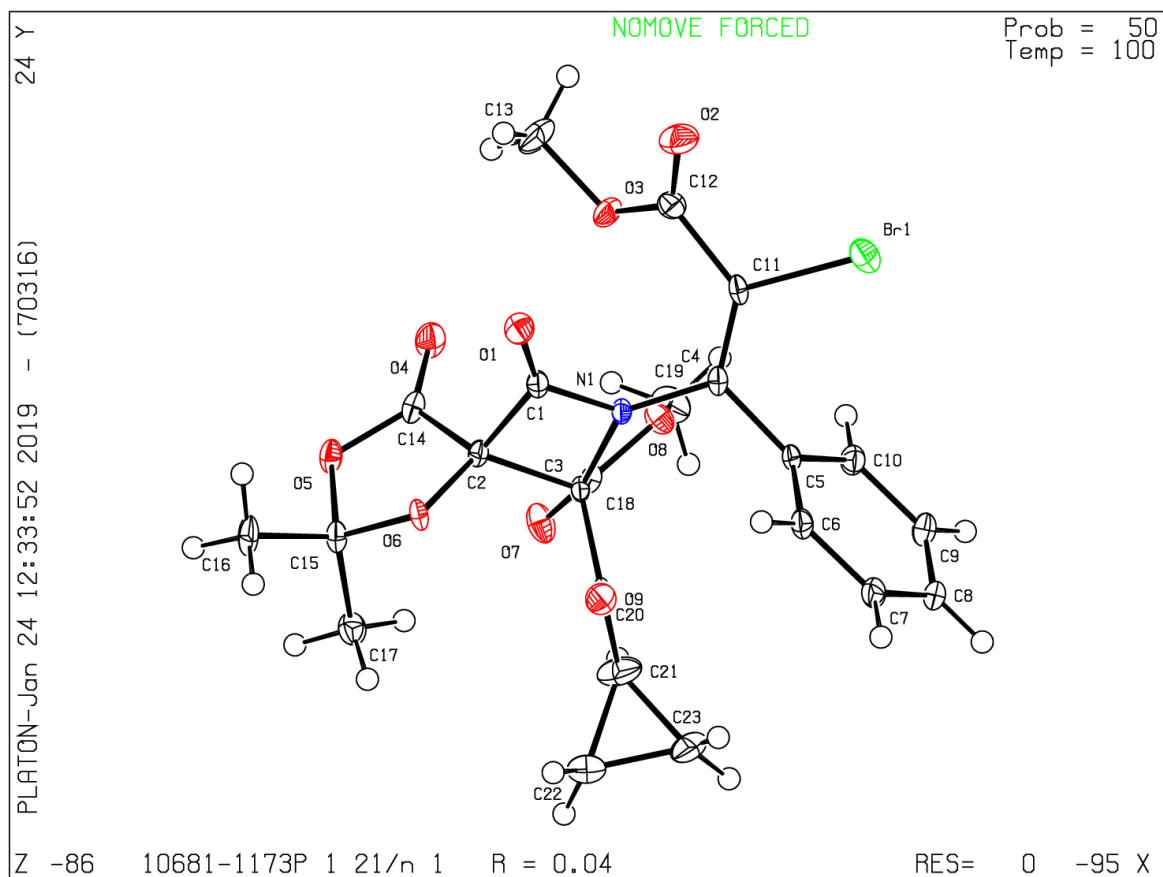

**Table S4.** Crystal data and structure refinement for compound **5r**.

|                                             |                                                               |
|---------------------------------------------|---------------------------------------------------------------|
| Identification code                         | 10681-11733_agf1                                              |
| Empirical formula                           | C <sub>23</sub> H <sub>22</sub> BrNO <sub>9</sub>             |
| Formula weight                              | 536.32                                                        |
| Temperature/K                               | 100(2)                                                        |
| Crystal system                              | monoclinic                                                    |
| Space group                                 | P2 <sub>1</sub> /n                                            |
| a/Å                                         | 11.66080(10)                                                  |
| b/Å                                         | 15.21840(10)                                                  |
| c/Å                                         | 13.20380(10)                                                  |
| α/°                                         | 90                                                            |
| β/°                                         | 91.1330(10)                                                   |
| γ/°                                         | 90                                                            |
| Volume/Å <sup>3</sup>                       | 2342.67(3)                                                    |
| Z                                           | 4                                                             |
| ρ <sub>calc</sub> /cm <sup>3</sup>          | 1.521                                                         |
| μ/mm <sup>-1</sup>                          | 2.867                                                         |
| F(000)                                      | 1096.0                                                        |
| Crystal size/mm <sup>3</sup>                | 0.24 × 0.16 × 0.14                                            |
| Radiation                                   | CuKα (λ = 1.54184)                                            |
| 2θ range for data collection/°              | 8.868 to 145.802                                              |
| Index ranges                                | -14 ≤ h ≤ 13, -18 ≤ k ≤ 18, -15 ≤ l ≤ 16                      |
| Reflections collected                       | 23811                                                         |
| Independent reflections                     | 4641 [R <sub>int</sub> = 0.0294, R <sub>sigma</sub> = 0.0163] |
| Data/restraints/parameters                  | 4641/0/312                                                    |
| Goodness-of-fit on F <sup>2</sup>           | 1.087                                                         |
| Final R indexes [I ≥ 2σ (I)]                | R <sub>1</sub> = 0.0398, wR <sub>2</sub> = 0.1143             |
| Final R indexes [all data]                  | R <sub>1</sub> = 0.0402, wR <sub>2</sub> = 0.1147             |
| Largest diff. peak/hole / e Å <sup>-3</sup> | 0.55/-1.19                                                    |

## 5. References

1. N. V. Rostovskii, A. V. Agafonova, I. A. Smetanin, M. S. Novikov, A. F. Khlebnikov, J. O. Ruvinskaya, G. L. Starova, *Synthesis*, 2017, **28**, 4478–4488.
